1  
2  
3  
4  
5  
6  
7  
8  
9  
10  
11  
12  
13  
14  
15  
16  
17  
18  
19  
20  
21  
22  
23  
24

**Identification of Multiple Iron Uptake Mechanisms in *Enterococcus faecalis* and Their Relationship to Virulence**

**Debra N. Brunson, Cristina Colomer-Winter, Ling Ning Lam, José A. Lemos\***

**Department of Oral Biology, University of Florida College of Dentistry, Gainesville, FL,  
USA**

**Running title:** Iron uptake in *E. faecalis*

**\* Correspondence:** [jlemos@dental.ufl.edu](mailto:jlemos@dental.ufl.edu)

25 **ABSTRACT**

26 Among the unfavorable conditions bacteria encounter within the host is restricted access to  
27 essential trace metals such as iron. To overcome iron deficiency, bacteria deploy multiple  
28 strategies to scavenge iron from host tissues with abundant examples of iron acquisition  
29 systems being implicated in bacterial pathogenesis. Yet, the mechanisms utilized by the major  
30 nosocomial pathogen *Enterococcus faecalis* to maintain intracellular iron balance are poorly  
31 understood. In this report, we conducted a systematic investigation to identify and characterize  
32 the iron acquisition mechanisms of *E. faecalis* and to determine their contribution to virulence.  
33 Bioinformatic analysis and literature surveys revealed that *E. faecalis* possesses three  
34 conserved iron uptake systems. Through transcriptomics, we discovered two novel ABC-type  
35 transporters that mediate iron uptake. While inactivation of a single transporter had minimal  
36 impact on the ability of *E. faecalis* to maintain iron homeostasis, inactivation of all five systems  
37 ( $\Delta 5\text{Fe}$  strain) disrupted intracellular iron homeostasis and considerably impaired cell growth  
38 under iron-deficiency. Virulence of the  $\Delta 5\text{Fe}$  strain was generally impaired in different animal  
39 models but showed niche-specific variations in mouse models, leading us to suspect that heme  
40 can serve as an iron source to *E. faecalis* during mammalian infections. Indeed, heme  
41 supplementation restored growth of  $\Delta 5\text{Fe}$  under iron-depletion and virulence in an invertebrate  
42 infection model. Collectively, this study reveals that the collective contribution of five iron  
43 transporters promotes *E. faecalis* virulence and that the ability to acquire and utilize heme as an  
44 iron source is critical to the systemic dissemination of *E. faecalis*.

45

## 46 INTRODUCTION

47 A resident of the gastrointestinal tract of animals and humans, *Enterococcus faecalis* is also  
48 a major opportunistic pathogen which includes but are not restricted to central line associated  
49 bloodstream infections (CLABSI), infective endocarditis, catheter associated urinary tract  
50 infections (CAUTI), and wound infections (1). Over the past several decades, the haphazard  
51 prescription of antibiotics combined with the intrinsic hardy nature of *E. faecalis*, including  
52 natural and acquired resistance to antibiotics, have contributed to a sustained and often times  
53 increased presence of enterococcal infection outbreaks in healthcare settings or in the  
54 community (2). Generally considered a low-grade pathogen due to the limited number of tissue  
55 damaging factors encoded in its core genome, the virulence potential of *E. faecalis* is thought to  
56 derive from a capacity to form robust biofilms on tissues or on indwelling devices, to thrive under  
57 a variety of adverse environmental conditions, and to subvert the immune system (3-5).  
58 Therefore, a better understanding of the mechanisms utilized by *E. faecalis* to survive under  
59 unfavorable conditions, especially those encountered within the human host, can potentially  
60 provide new therapeutic leads.

61 Among the adverse conditions pathogens encounter during infection is limited access to  
62 essential trace metals, in particular iron, manganese, and zinc that are actively sequestered by  
63 metal-binding host proteins as part of an antimicrobial process known as nutritional immunity (6-  
64 10). Iron is of particular significance as it is the preferred metal cofactor of enzymes that carry  
65 out fundamental cellular processes such that it plays a central role in host pathogen interactions  
66 (6, 11, 12). Despite being the most abundant trace metal in vertebrate tissues, iron is not readily  
67 available to bacterial pathogens because the vast majority of this element found in the host is  
68 complexed to heme inside red blood cells or bound to ferritin, an intracellular protein produced  
69 in hepatocytes that serves as the principal iron storage protein in mammalian cells (13). In  
70 addition, several host-produced proteins avidly bind free iron either to avoid iron toxicity to host  
71 tissues or as part of the nutritional immunity process (12, 14, 15). For instance, the liver

72 produces and secretes transferrin (TF), which binds free  $\text{Fe}^{+3}$  in the bloodstream and at sites of  
73 infection, which is then recycled by macrophages by unloading iron to intracellular ferritin and  
74 returning apo-TF into circulation (13). In mucosal surfaces, free iron is sequestered by lactoferrin  
75 that is also found in high concentrations in human secretions such as saliva (16). While primarily  
76 known for its role in manganese and zinc sequestration, neutrophil-secreted calprotectin has  
77 been shown to efficiently chelate  $\text{Fe}^{2+}$  in anaerobic environments *in vivo* (9, 17). All these  
78 factors combined with the low solubility of  $\text{Fe}^{+3}$  in sera make free iron concentrations within  
79 vertebrates to be several orders of magnitude below the concentration range required for  
80 microbial growth (12, 18, 19).

81 To overcome host-imposed iron starvation, bacterial pathogens deploy multiple strategies to  
82 scavenge free iron directly or intracellularly stored, bound to organic molecules (such as heme)  
83 within hemoproteins, or mobilized to iron-binding proteins (6, 10, 20-22). Perhaps the most  
84 effective strategy utilized by bacteria to scavenge iron is via the production of siderophores  
85 (“iron carrier” from the Greek), which are low molecular mass organic molecules that are among  
86 the strongest metal chelators known to date (23, 24). While not all bacteria synthesize  
87 siderophores, high affinity surface-associated iron transporters are ubiquitous in bacteria with  
88 some of the most successful blood borne pathogens encoding at least one dedicated heme  
89 acquisition system in addition to elemental iron transporters (19, 21, 25, 26). Not surprisingly,  
90 many of the genes associated with siderophore biosynthesis and uptake as well as iron and  
91 heme transporters have been directly implicated in bacterial virulence (6, 25, 27-30). In recent  
92 years, our group identified and characterized the manganese and zinc import systems of *E.*  
93 *faecalis* showing that the well-coordinated activity of either manganese (EfaCBA, MntH1 and  
94 MntH2) or zinc (AdcABC and AdcAll) transporters is critical to *E. faecalis* fitness and virulence  
95 (31, 32). However, when it comes to the mechanisms utilized by the enterococci to maintain iron  
96 homeostasis and its relationship to enterococcal pathogenesis, current knowledge is restricted  
97 to *in silico* and transcriptome-based studies showing that *E. faecalis* encodes three highly

98 conserved iron import systems that are regulated by either the DtxR-like/EfaR repressor  
99 (EfaCBA) or the Fur-like repressor (FeoAB and FhuDCBG) (33-35). To fill this current  
100 knowledge gap, we sought in this study to identify and characterize the mechanisms utilized by  
101 *E. faecalis* to overcome iron starvation and determine the individual and collective contributions  
102 of iron uptake systems to *E. faecalis* virulence. Through transcriptomics, we identified two  
103 additional and previously uncharacterized ABC-type iron transporters restricted to enterococci  
104 and a limited number of streptococcal species. We named the novel iron transporters FitABCD  
105 and EmtABC and generated strains lacking one or both transporters using the  $\Delta fitAB\Delta emtB$   
106 double mutant as the background to generate a quintuple mutant also lacking *efaCBA*, *feoAB*  
107 and *fhuDCBG* ( $\Delta 5Fe$  strain). Characterization of these mutant strains revealed that *E. faecalis*  
108 indeed utilizes multiple iron transporters to acquire iron under iron-depleted conditions and that  
109 their collective activity is important for enterococcal pathogenesis in a niche-specific manner. In  
110 addition, evidence that *E. faecalis* can utilize heme as an alternative iron source and that  
111 unidentified heme transporter(s) might be critical for systemic dissemination and disease  
112 outcome is also provided.

113

## 114 RESULTS

115 **Two uncharacterized ABC-type transporters are the most upregulated genes in *E.***  
116 ***faecalis* OG1RF grown under iron-depleted conditions.** To identify the genes and pathways  
117 utilized by *E. faecalis* to grow under iron starvation, we used RNA deep sequencing (RNA-seq)  
118 to compare the transcriptome of the parent strain OG1RF grown to mid-log in the chemically  
119 defined FMC medium (31, 36) with or without the addition of  $FeSO_4$  as an iron source (Table  
120 S1). Despite the ~1600-fold difference in iron content of the two media formulations (~80  $\mu M$   
121 total iron in FMC[+Fe] compared to ~0.05  $\mu M$  total iron in FMC[-Fe], Table 1), the ability of  
122 different *E. faecalis* and *E. faecium* strains to grow under iron-replete or iron-depleted conditions  
123 was remarkably similar (Fig. 1). Moreover, quantification of intracellular elemental iron in the *E.*

124 *faecalis* OG1RF strain grown to mid-log phase in FMC[+Fe] or FMC[-Fe] revealed a small and  
125 not statistically significant difference between the two conditions ( $0.410 \pm 0.122$   $\mu$ M intracellular  
126 iron in FMC[+Fe] versus  $0.322 \pm 0.127$   $\mu$ M iron in FMC[-Fe]). These results strongly indicate that  
127 the enterococci are well equipped to scavenge iron and maintain iron homeostasis under  
128 extreme conditions. To facilitate interpretation of the RNA-seq study, we used a false discover  
129 rate (FDR) of 0.01 and applied a 2-fold cutoff to generate a list of differently expressed genes  
130 (Table S2). For illustration purposes, the 200 differentially expressed genes (92 upregulated and  
131 108 downregulated) were grouped according to Clusters of Orthologous Groups (COG)  
132 functional categories, with genes coding for membrane-associated transporters (22%),  
133 metabolism (31%), and hypothetical proteins (53%) comprising the majority of genes identified  
134 in the comparison (Fig. 2). When compared to cells grown in FMC[+Fe], the most upregulated  
135 genes (varying from 2.6- to 7.7-fold induction) in cells grown in FMC[-Fe] coded for proteins that  
136 belong two uncharacterized ABC-type transport operons (OG1RF\_RS12045 to OG1RF\_12060  
137 and OG1RF\_RS12585 to OG1RF\_12595) (Table S2, Fig. 3). While there is no previous  
138 experimental evidence that these transporters are involved in metal uptake, OG1RF\_RS12045-  
139 12060 was previously shown to be part of the Fur (ferric uptake regulator) regulon (33) and is  
140 presently annotated as putative ABC-type iron transporter (35). Herein, we will refer to  
141 OG1RF\_RS12045-12060 as *fitABCD* for Fur regulated iron transporter and OG1RF\_RS12585-  
142 12595 as *emtABC* for enterococcal metal transporter. Based on searches of public databases  
143 and phylogenetic tree analyses with the substrate binding proteins FitD or EmtC, the proteins  
144 encoded by the *fitABCD* and *emtABC* are highly conserved among the enterococci (Fig. 3 and  
145 Fig. 4). Beyond enterococci, FitD shares ~ 48% amino acid identity and ~ 65% similarity with the  
146 *B. subtilis* YclQ and *S. pneumoniae* SPD\_RS08810 whereas the non-enterococcal protein most  
147 closely related to EmtC is the *S. pyogenes* RS01525 that shares 29% identity and 47%  
148 similarity with EmtC. Notably, the *Bacillus subtilis* YclNOPQ has been implicated in the uptake  
149 of the petrobactin siderophore (33, 37) such that it is possible that EitABCD is involved in the

150 uptake of siderophore. Other than the upregulation of *fitABCD* and *emtABC* operons, few other  
151 notable alterations in the iron starvation transcriptome were the upregulation of genes from the  
152 mannose PTS and pyrimidine biosynthesis operons and the downregulation of two P-type  
153 ATPases annotated as magnesium import transporters and the tellurite (toxic anion) resistance  
154 protein (Table S2). While studies to understand the significance of these other notable  
155 transcriptional changes to growth under iron starvation were not pursued in this study, these  
156 changes are suggestive of adaptation to iron starvation triggering changes in carbon and nucleic  
157 acid metabolism and metal resistance profiles.

158

159 **FitABCD and EmtABC are important but not critical for growth under low iron conditions.**

160 To determine the contributions of FitABCD and EmtABC to growth of *E. faecalis* under replete  
161 or depleted iron conditions, each system was inactivated alone or in combination and the ability  
162 of  $\Delta fitAB$ ,  $\Delta emtB$  and  $\Delta fitAB\Delta emtB$  strains to grow in media containing different concentrations  
163 of iron and manganese assessed. In Brain Heart Infusion (BHI), a complex media with  $\sim 6.5 \mu\text{M}$   
164 iron, all mutants grew as well as the parent strain OG1RF (Fig. 5A). In (chemically-defined)  
165 FMC, which contains high concentrations of iron ( $75 \mu\text{M FeSO}_4$ ) and manganese ( $100 \mu\text{M}$   
166  $\text{MnSO}_4$ ) in the original recipe (36), all strains grew well although  $\Delta fitAB$  and  $\Delta fitAB\Delta emtB$   
167 attained slightly lower final growth yields (Fig. 5B). The omission of  $\text{FeSO}_4$  from FMC slightly  
168 delayed growth and further lower final growth yields of  $\Delta fitAB$  and  $\Delta fitAB\Delta emtB$  as well as  
169  $\Delta emtB$  (Fig. 5C). Because iron and manganese may function as interchangeable cofactors and  
170 *E. faecalis* is deemed a “manganese-centric” organism (31), we prepared a modified low metal  
171 FMC (LM-FMC) formulation containing  $1/10^{\text{th}}$  of the original concentrations of iron and  
172 manganese for subsequent studies (Table 1). Like the original FMC recipe, the  $\Delta fitAB$  and  
173  $\Delta fitAB\Delta emtB$  strains reached lower final growth yields in complete LM-FMC with all mutants  
174 growing more poorly in LM-FMC[-Fe] (Fig. 5D-E). Finally, all strains (parent strain included)

175 grew slower and reached lower final growth yields in LM-FMC lacking both iron and manganese  
176 (Fig. 5F). Collectively, these results indicate that FitABCD and EmtABC contribute but are not  
177 essential to growth under iron-depleted conditions.

178

179 **Temporal expression of iron transporters in response to iron starvation.** Previous studies  
180 revealed that the conserved iron transporters *feoAB* and *fhuDCBG* are regulated by the iron-  
181 sensing Fur regulator (33) whereas transcription of the dual iron/manganese transporter *efaCBA*  
182 is controlled by the manganese-sensing EfaR regulator (38). While none of the genes from the  
183 *feoAB*, *fhuDCBG* and *efaCBA* operons were differently expressed in our RNA-seq analysis, we  
184 suspected that their transcriptional activation in response to iron starvation may occur  
185 immediately after cells are starved for iron returning to basal expression levels after cells have  
186 become adapted to the new (low iron) environment. To investigate this possibility, we monitored  
187 (via reverse transcriptase quantitative PCR, RT-qPCR) the transcriptional pattern of *efaCBA*,  
188 *feoAB*, *fhuDCBG* as well as *fitABC* and *emtABC* within the first hour after cultures were  
189 switched from iron replete to iron depleted condition. Using one representative gene for each  
190 operon as proxy, we found that all transcriptional units were upregulated in response to iron  
191 starvation (Fig. 6). Noteworthy, this induction occurred in two distinctly separated surges. In the  
192 first surge appeared *emtB* and *efaA* that were strongly induced 10-min after cells were starved  
193 for iron but returning to near basal levels of expression after 60-min. In the second surge, *fitA*  
194 and *fhuB* were much more strongly induced at the later (60-min) time point. Finally, transcription  
195 of *feoB* was not altered during the initial 30 minutes but displayed a modest (yet significant)  
196 upregulation at 60-min such that considered *feoAB* part of the second surge. These results  
197 strongly suggest that *E. faecalis* encodes, at the minimum, five bona-fide iron import systems  
198 that can be grouped into early and late responders.

199



200 **Simultaneous inactivation of *efaCBA*, *feoAB*, *fhuDCBG*, *fitABCD* and *emtABC* further**  
201 **impairs growth in iron-depleted conditions.** To probe the individual and collective  
202 contributions of EfaCBA, FeoAB, and FhuDCBG to iron homeostasis, we took advantage of the  
203  $\Delta$ *efaCBA* strain that was already available in the lab (31) and isolated two new deletion mutants  
204 lacking FeoAB ( $\Delta$ *feoB*) and FhuDCBG ( $\Delta$ *fhuB*). In BHI, LM-FMC, LM-FMC[-Fe] or LM-FMC[-Fe  
205 and -Mn], the  $\Delta$ *feoB* and  $\Delta$ *fhuB* single mutants phenocopied the parent strain (Fig. S1). The  
206  $\Delta$ *efaCBA* strain also phenocopied growth of the parent strain in BHI, LM-FMC or LM-FMC[-Fe],  
207 but could barely grow in LM-FMC[-Fe and -Mn] (Fig. S1), a phenotype that can be attributed to  
208 the role of EfaCBA in the uptake of both iron and manganese (31). Because the dual role of  
209 EfaCBA in iron and manganese acquisition creates a confounding factor (impaired manganese  
210 uptake), we next isolated a  $\Delta$ *feoB* $\Delta$ *fhuB* $\Delta$ *fitAB* $\Delta$ *emtB* strain by sequentially inactivating *feoB*  
211 and *fhuB* in the  $\Delta$ *fitAB* $\Delta$ *emtB* background such that a functional EfaCBA is retained in this  
212 mutant. However, this quadruple mutant grew exactly like the double mutant  $\Delta$ *fitAB* $\Delta$ *emtB* in  
213 either LM-FMC or LM-FMC[-Fe] (Fig. S2). For this reason, our next step was to introduce the  
214 *efaCBA* deletion in the quadruple mutant background yielding the  
215  $\Delta$ *efaCBA* $\Delta$ *feoB* $\Delta$ *fhuB* $\Delta$ *fitAB* $\Delta$ *emtB* strain, which we will call  $\Delta$ 5Fe strain onwards. In BHI,  
216 FMC[+/-Fe] and LM-FMC, growth of the  $\Delta$ 5Fe strain was comparable to the growth rates and  
217 yields obtained for all singles, double ( $\Delta$ *fitAB* $\Delta$ *emtB*) and quadruple ( $\Delta$ *feoB* $\Delta$ *fhuB* $\Delta$ *fitAB* $\Delta$ *emtB*)  
218 mutants (Fig. 5A-D, Fig. S1 and Fig. S2). However, the  $\Delta$ 5Fe strain grew slower and had lower  
219 growth yields when compared to the  $\Delta$ *fitAB*,  $\Delta$ *emtB*, and  $\Delta$ *fitAB* $\Delta$ *emtB* strains grown in LM-  
220 FMC[-Fe] and LM-FMC[-Fe and -Mn] (Fig. 5E-F).

221 To further understand the specific contributions of FitABCD and EmtABC and the collective  
222 contribution of the five transporters to iron homeostasis, we used inductively coupled plasma  
223 optical-emission spectrometry (ICP-OES) to determine the intracellular iron concentrations in  
224 the parent,  $\Delta$ *fitAB*,  $\Delta$ *emtB*,  $\Delta$ *fitAB* $\Delta$ *emtB* and  $\Delta$ 5Fe strains grown to mid-log phase in either LM-  
225 FMC or LM-FMC[-Fe]. In agreement with results showing that all strains grow well in iron replete

226 media (Fig. 5), no significant differences in intracellular iron content were observed between  
227 parent and mutant strains when grown in LM-FMC (Fig. 7A). On the other hand, intracellular  
228 iron pools were significantly lower in the  $\Delta emtB$  ( $p \leq 0.05$ ) and  $\Delta 5Fe$  strains ( $p \leq 0.001$ ) when  
229 grown in LM-FMC[-Fe]. While the  $\sim 45\%$  reduction in iron pools in the  $\Delta emtB$  strain is  
230 apparently at odds with the results obtained with the  $\Delta fitAB$  or double mutant strains, the  $\sim 90\%$   
231 reduction observed for the quintuple mutant bodes well with the marked growth defect of this  
232 strain in LM-FMC[-Fe]. To complement these observations, we determined iron ( $^{55}Fe$ ) uptake  
233 kinetics in cultures of the parent,  $\Delta fitAB\Delta emtB$  and  $\Delta 5Fe$  strains grown to mid-log phase in LM-  
234 FMC[-Fe]. Time course monitoring of  $^{55}Fe$  uptake revealed a linear increase in iron uptake for  
235 the parent and  $\Delta fitAB\Delta emtB$  strains, while  $\Delta 5Fe$  displayed a non-linear and significantly ( $p \leq$   
236 0.01) reduced capacity to take up  $^{55}Fe$  over time (Fig. 7B).

237 Next, we asked if loss of FitABCD, EmtABC, or all five iron transporters affected the  
238 pathogenic potential of *E. faecalis* by testing the ability of the  $\Delta fitAB$ ,  $\Delta emtB$ ,  $\Delta fitAB\Delta emtB$  and  
239  $\Delta 5Fe$  strains to grow and remain viable in human sera *ex vivo* as well as their virulence  
240 potential in the *Galleria mellonella* invertebrate model and in two mouse infection models. We  
241 found that, in comparison with the parent strain, the  $\Delta 5Fe$  strain but not  $\Delta fitAB$ ,  $\Delta emtB$  or  
242  $\Delta fitAB\Delta emtB$  was recovered in significant lower numbers after 24 hours incubation in pooled  
243 human sera at 37°C (Fig. S3). We expanded the sera growth/survival analysis by comparing the  
244 ability of parent and  $\Delta 5Fe$  strains to grow and then remain viable in sera for up to 48 hours.  
245 Similar to previous studies showing that mutants with defects in manganese or zinc uptake grow  
246 poorly in sera (31, 32), the  $\Delta 5Fe$  displayed a marked and significant growth defect in sera  
247 growing less than 1-log during the initial 12 hours of incubation compared to the parent strain  
248 that grew nearly 2-logs over the same period of time (Fig. 8A).

249 Because trace metal sequestration is an evolutionarily conserved defense mechanism  
250 present in both vertebrates and invertebrates (39-41), previous studies conducted by our group

251 revealed that virulence of manganese or zinc transport mutants in *Galleria mellonella* was  
252 severely compromised (31, 32), we assessed the ability of these mutants to kill *G. mellonella*.  
253 While the trends of the Kaplan-Meier curves shown in Figure 8B are indicative that virulence  
254 may be compromised in all the mutants tested, statistical significance ( $p \leq 0.01$ ) were only  
255 achieved when comparing parent and  $\Delta 5Fe$  strains.

256 Our next step was to expand the *in vivo* studies to two mouse infections models; a peritonitis  
257 model where infection becomes systemic within 12 to 24 hours (42-44) and an incision wound  
258 infection model that was recently established in the lab (45). In the peritonitis model, the  $\Delta 5Fe$   
259 strain showed ~1-log reduction ( $p \leq 0.0001$ ) in the number of total bacteria recovered from the  
260 peritoneal cavity 48 hours post-infection when compared to the parent,  $\Delta fitAB$ ,  $\Delta emtB$  and  
261  $\Delta fitAB\Delta emtB$  strains (Fig. 8C). However, parent and all mutants, including  $\Delta 5Fe$ , were  
262 recovered in similar numbers from spleens (Fig. 8C). On the other hand, with exception of  
263  $\Delta emtB$ , all mutants were recovered from wounds in significantly lower numbers ( $p \leq 0.05$ ) when  
264 compared to wounds infected with the parent strain (Fig. 8D).

265  
266 ***E. faecalis* can utilize heme as an iron source for *E. faecalis*.** To this point, the results  
267 obtained indicate that *E. faecalis* relies on the cooperative activity of at least five iron uptake  
268 systems to overcome iron deficiency. However, the *in vivo* results suggest that *E. faecalis* can  
269 deploy additional strategies to quench its need for iron during infection. Because the most  
270 abundant source of iron in mammals is in the form of heme whereby an iron ion is coordinated  
271 to a porphyrin molecule, and considering that some of the most successful invasive pathogens  
272 encode at least one dedicated heme import systems (12, 26-29, 46-49), we suspected that *E.*  
273 *faecalis* can also use heme as an iron source. In fact, *E. faecalis* has at least two heme-  
274 dependent enzymes, catalase (KatA) and cytochrome oxidase (CydAB) (50-52), and a heme  
275 exporter (HrtAB) and heme-sensing regulator (FhtR) that are used to overcome heme

276 intoxication (53). Yet, *E. faecalis* does not encode the machinery for heme biosynthesis or  
277 systems homologous to any of the more conserved heme uptake systems, such that it remains  
278 elusive how *E. faecalis* acquires extracellular heme. Next, we asked if supplementation of the  
279 growth media with 10  $\mu$ M heme could restore growth of the  $\Delta$ 5Fe strain in LM-FMC[-Fe]. As  
280 suspected, the addition of heme greatly increased growth rates and yields of the  $\Delta$ 5Fe strain in  
281 iron-depleted media albeit it also enhanced the final growth yield of the parent strain (Fig. 9A).  
282 Most likely, the beneficial effects of heme on cell growth are due to heme serving as the  
283 enzymatic co-factor for cytochrome oxidase and an iron source. To further probe the role of  
284 heme in iron homeostasis, we compared intracellular levels of heme and iron in parent and  
285  $\Delta$ 5Fe strains grown in LM-FMC[-Fe] plus or minus 10  $\mu$ M heme. As expected, heme was  
286 undetectable unless it was added to the growth media with both strains accumulating  
287 comparable levels of heme when grown in heme-supplemented LM-FMC (Fig. 9B). Importantly,  
288 heme supplementation more than doubled intracellular iron levels in the parent strain and  
289 restored intracellular iron homeostasis in the  $\Delta$ 5Fe strain (Fig. 9C). Collectively, these results  
290 reveal that *E. faecalis* can internalize heme and then degrade intracellularly to release the iron  
291 ion. On a separate note, the differences in intracellular iron levels in the  $\Delta$ 5Fe strain grown in  
292 LM-FMC[-Fe] that were significantly lower but quantifiable in Fig. 7A but below the limit of  
293 detection in Fig. 9C are a faithful representation of the variations that we observe between  
294 differences batches of media.

295 Next, we asked if exogenous heme could restore growth of  $\Delta$ 5Fe in human sera or its  
296 virulence in the *G. mellonella* model. While the fresh human sera used is expected to contain  
297 iron-sequestering and heme-sequestering proteins, addition of 10  $\mu$ M  $\text{FeSO}_4$  or 10  $\mu$ M heme to  
298 the sera rescued the growth defect phenotype of the  $\Delta$ 5Fe strain without providing a noticeable  
299 growth advantage to the parent strain (Fig 9D). Because oxygen is not transported via  
300 hemoglobin/Fe-heme complexes in insects but rather through binding to two copper ions  
301 coordinated by histidine residues in hemocyanins (54), non-hematophagous insects such as *G.*

302 *mellonella* are considered to be heme-free (55). Thus, in the last set of experiments, we injected  
303 the hemolymph of *G. mellonella* with 50 pmol heme *b* (in the form of hemin) one hour prior to  
304 infecting the larvae with the desired *E. faecalis* strain. While heme administration did not affect  
305 the pathogenic behavior of the parent strain, it fully restored virulence of  $\Delta 5Fe$  strain (Fig. 9E).  
306 These results led us to conclude that *E. faecalis* can acquire heme from the environment and  
307 that host-derived heme is an important source of iron during infection.

308

## 309 **DISCUSSION**

310 Despite the nearly universal role of iron in host-pathogen interactions, (6, 7, 14, 19-23, 56),  
311 very little is currently known about the mechanisms utilized by *E. faecalis* to obtain iron from the  
312 extracellular milieu and much less so about the contribution of iron import systems to  
313 enterococcal fitness and pathogenic behavior. In a series of studies that spanned through two  
314 decades, Lisiecki and colleagues were the first to propose that enterococci utilize multiple  
315 strategies to scavenge iron, which included production of siderophores, expression of high-  
316 affinity iron transporters, and an undefined capacity to seize iron directly from host transferrin  
317 and lactoferrin (57-59). Yet, most of their observations have not been validated by others and, at  
318 least in the case of siderophore production, appears to be incorrect based on the absence of the  
319 machinery necessary for siderophore biosynthesis in *E. faecalis* genomes. Indeed, our multiple  
320 attempts to detect siderophore production in different strains of *E. faecalis* or *E. faecium* using  
321 the CAS (Chrom Azurol S) method (60) were not successful (data not shown). In addition to the  
322 work by Lisiecki and colleagues, *in silico* and transcriptome-based analyses using a  $\Delta fur$  mutant  
323 have indicated that *E. faecalis* possess three highly conserved iron import systems, the ferrous  
324 iron transporter FeoAB, the ferrichrome transporter FhuDCBG, and the dual iron/manganese  
325 transporter EfaCBA (31, 33-35).

326 In this report, we validated previous studies (61) showing that either *E. faecalis* or *E.*  
327 *faecium* isolates can grow in media that can be considered virtually iron-free (0 to 0.003 parts

328 per million iron depending on the batch of media). While the remarkable capacity of enterococci  
329 and of other lactic acid bacteria to grow under nearly iron-free conditions has been attributed to  
330 their “manganese-centric” nature, intracellular iron quantifications revealed that *E. faecalis*  
331 accumulates similar amounts of iron when grown in iron replete or iron depleted media. Rather  
332 than suggesting that *E. faecalis* does not require iron for growth as once suggested (62), we  
333 believe that iron is such an essential micronutrient to *E. faecalis* that it evolved multiple, diverse,  
334 and highly efficient systems to acquire and maintain iron homeostasis.

335 In addition to the conserved iron import systems EfaCBA, FeoAB and FhuDCBG, our  
336 transcriptomic analysis identified two novel ABC-type iron transporters that were named  
337 FitABCD and EmtABC. While this is the first time that EmtABC is linked to iron uptake,  
338 FitABCD was previously shown to be a member of the Fur regulon (33). Moreover, *ex vivo* and  
339 *in vivo* transcriptome analysis have shown that, except for *fhuDCBG*, all other systems are  
340 highly expressed under physiologically relevant conditions. For example, *fitABCD* was  
341 upregulated by ~4-fold in both human blood and human urine *ex vivo*, and 23- to 42-fold in a  
342 subdermal abscess rabbit model (63-65). The dual iron/manganese transporter *efaCBA* was  
343 upregulated ~3-fold in either human blood or urine (63, 64), ~2-fold in the abscess rabbit model  
344 (65), and ~7-fold in a peritonitis mouse model (44). Finally, *emtABC* was upregulated ~3-fold in  
345 human blood (63) and *feoAB* upregulated by ~2-fold in human urine and ~5-fold in the abscess  
346 rabbit model (64, 65). In this study, we showed that the individual responses of these  
347 transcriptional units to iron depletion can be divided into early (*efaCBA* and *emtABC*) and late  
348 (*fitABCD*, *feoAB*, and *fhuDCBG*) responders. Moreover, all late responders have been shown to  
349 be regulated by Fur (33) while *efaCBA* is regulated by EfaR (38, 66). Through bioinformatic  
350 analysis, we identified a putative EfaR-binding motif (38) located 13-bp upstream from the  
351 *emtABC* translational start site. Therefore, it is conceivable that transcriptional induction of iron  
352 acquisition systems is distinctly controlled by Fur and EfaR. The occurrence of these two distinct  
353 transcriptional surges is reminiscent of the stepwise induction of iron uptake systems in *B.*

354 *subtilis* whereby elemental iron, ferric citrate, and petrobactin operons are induced in the first  
355 wave and bacillibactin synthesis and uptake, and hydroxamate siderophore uptake induced in  
356 the second wave (67). However, in *B. subtilis*, this sequential activation was solely dependent  
357 on the Fur regulator with subsequent experiments demonstrating that the stepwise  
358 transcriptional activation correlated with Fur operator occupancy *in vivo* (67). More studies are  
359 needed to determine if EfaR directly regulates *emtABC* and to validate the working hypothesis  
360 that iron starvation responses in *E. faecalis* can be separated by EfaR-regulated early  
361 responders and Fur-regulated late responders.

362 Even though systems homologous to EfaABC, FeoAB and FhuDCBG are widespread and  
363 have been relatively well characterized in bacteria (21, 56, 68-71), predicted proteins sharing  
364 high levels ( $\geq 80\%$ ) of similarity with FitABCD or EmtABC are almost entirely restricted to  
365 species of the enterococcaceae family, with FitD and EmtC sharing slightly lower similarity (~60-  
366 65%) with substrate-binding proteins from selected streptococci and bacilli. Of interest, the *B.*  
367 *subtilis* YclNOPQ transporter is responsible for uptake of the petrobactin siderophore (37),  
368 raising the possibility that FitABC mediates siderophore uptake. This might also be the case of  
369 FhuDCBG that mediates uptake of ferric hydroxamate-type siderophores in other bacteria (72).  
370 As mentioned above, it appears that enterococci cannot synthesize its own siderophores such  
371 that these systems might be involved in xenosiderophore uptake or other types of iron source.  
372 Additional studies are necessary to determine the iron species specificity and affinities of  
373 FitABCD and EmtABC.

374 The finding that *E. faecalis* possesses multiple systems to acquire iron is not surprising  
375 when considering their capacity to inhabit a variety of niches within the host, from the  
376 gastrointestinal tract to the skin, oral cavity, and the genitourinary tract, and to remain viable for  
377 prolonged periods when excreted into the environment. In addition, there are numerous  
378 examples in the literature describing how bacteria deploy multiple and complementary  
379 strategies to maintain iron homeostasis. As mentioned above, *B. subtilis* encodes transporters



380 for the uptake of elemental iron, ferric citrate, different types of siderophores, in addition to  
381 producing its own siderophore and cognate import system (67). Similarly, *S. aureus* encodes  
382 transporters for elemental iron, iron hydroxamates, and synthesizes two types of siderophores  
383 (staphyloferrin A and B) along with their cognate importers (21). In addition, *S. aureus* encodes  
384 the Isd system that mediates binding, degradation, and uptake of iron-heme complexes (49, 73).  
385 Similar to *S. aureus*, some of the major pathogenic species of streptococci encode a suite of  
386 elemental iron, siderophore and heme transport systems (21, 29, 74, 75). As expected,  
387 inactivation of a single iron transport system had minimal or no impact on the ability of *E.*  
388 *faecalis* to grow under severe iron deficiency. To demonstrate this functional overlap, we  
389 generated a quintuple ( $\Delta 5\text{Fe}$ ) mutant lacking all five systems. The  $\Delta 5\text{Fe}$  strain grew poorly in  
390 media without an added iron source, accumulated considerably less intracellular iron than the  
391 parental strain, and showed major deficiency in elemental iron uptake. The  $\Delta 5\text{Fe}$  strain also  
392 failed to grow in media depleted of both iron and manganese, likely because EfaCBA is a dual  
393 iron and manganese transporter. Despite these observations and considering that vertebrate  
394 hosts actively restrict both iron and manganese during infection, we found that the virulence  
395 potential of  $\Delta 5\text{Fe}$  varied depending on the model used and, possibly, the site of infection within  
396 the vertebrate host. While virulence of  $\Delta 5\text{Fe}$  was markedly attenuated in *G. mellonella*, and the  
397 mutant was recovered in significantly lower numbers from mouse peritoneal cavity and infected  
398 mouse wounds, parent and  $\Delta 5\text{Fe}$  strains were recovered in similar numbers from spleens in the  
399 peritonitis model. We suspected that the capacity to utilize heme as an iron source was behind  
400 this apparent conflicting result. To explore this possibility, we conducted a series of experiments  
401 that showed that *E. faecalis* is indeed capable of using heme as an iron source and that heme  
402 supplementation restores virulence of the  $\Delta 5\text{Fe}$  strain in *G. mellonella*. While *E. faecalis* does  
403 not possess the machinery for heme biosynthesis and does not require heme for growth (52,  
404 76), it encodes at least two heme-dependent enzymes, cytochrome *bd* oxidase and catalase,  
405 such that it must have the capacity to obtain heme from the extracellular milieu. Yet, systems



406 homologous to known heme transport systems such as the *S. aureus* Ihd or the *S. pyogenes*  
407 Sia are absent in enterococcal genomes. During preparation of this manuscript, the Kline lab  
408 provided initial evidence that the ABC-type integral membrane proteins CydCD, previously  
409 implicated in cytochrome assembly and cysteine export (77, 78), mediate heme uptake (79).  
410 While additional studies are needed to confirm the role of CydCD in heme uptake, it is also  
411 apparent that CydCD are not working alone in heme uptake since heme-dependent catalase  
412 activity can be still detected in *cydABCD* mutants (51). Studies to identify the elusive heme  
413 import systems of *E. faecalis*, to separate the significance of heme as a nutrient and as an iron  
414 source, and to determine how disruption of heme uptake will affect the pathogenic potential of  
415 *E. faecalis* in different types of infection are ongoing.

416

## 417 **MATERIALS AND METHODS**

418 **Bacterial strains and growth conditions.** Bacterial strains used in this study are listed in  
419 Table 2. All *E. faecalis* strains were routinely grown aerobically at 37°C in brain heart infusion  
420 (Difco). For controlled growth under metal-depleted conditions, we used the chemically defined  
421 FMC media originally developed for cultivation of oral streptococci (36), with minor  
422 modifications. Specifically, the base media was prepared without any of the metal components  
423 (magnesium, calcium, iron, and manganese) and treated with Chelex (BioRad) to remove  
424 contaminating metals. The pH was adjusted to 7.0 and filter sterilized. Magnesium and calcium  
425 solutions were prepared using National Exposure Research Laboratory (NERL) trace metal  
426 grade water, filter sterilized, and then added to the media. Iron and manganese solutions were  
427 also prepared using NERL trace metal grade water, filter sterilized, and added to the media as  
428 indicated in the text and figure legends. For RNA-seq analysis, overnight BHI cultures of *E.*  
429 *faecalis* OG1RF were diluted 1:100 in FMC[+Fe] or FMC[-Fe] and grown to an OD<sub>600</sub> of 0.5  
430 before cells were collected for RNA isolation. For reverse transcriptase quantitative PCR (RT-  
431 qPCR) analysis, RNA was isolated from cells grown in FMC[+Fe] and then shifted to FMC[-Fe]

432 with aliquots taken 10, 30, and 60 minutes after the shift. To generate growth curves, cultures  
433 were grown in BHI to an OD<sub>600</sub> of 0.25 (early exponential phase) and then diluted 1:200 into  
434 fresh media that were either BHI, FMC or LM-FMC supplemented with heme, iron, and/or  
435 manganese as indicated in the text and figure legends. Cell growth was monitored using the  
436 Bioscreen growth reader (Oy Growth Curves).

437

438 **Construction of mutant strains.** Markerless deletions of *fitAB*, *emtB*, *feoB* or *fhuB* in  
439 *E. faecalis* OG1RF strain was carried out using the pCJK47 genetic exchange system (31).  
440 Briefly, PCR products with ~1 kb in size flanking each coding sequence were amplified with the  
441 primers listed in Table S3. To avoid unanticipated polar effects, amplicons included either the  
442 first or last residues of the coding sequences. Cloning of amplicons into the pCJK47 vector,  
443 electroporation, and conjugation into *E. faecalis* strains and isolation of single mutant strains  
444 ( $\Delta fitAB$ ,  $\Delta emtB$ ,  $\Delta feoB$  and  $\Delta fhuB$ ) were carried out as previously described (31). The  
445  $\Delta fitAB\Delta emtB$  double mutant was obtained by conjugating the pCJK-*emtB* plasmid into the  
446  $\Delta fitAB$  mutant. Then, a triple mutant was obtained by conjugating the pCJK-*fhuB* plasmid into  
447 the  $\Delta fitAB\Delta emtB$  double mutant and a quadruple obtained by conjugation of pCJK47-*feoB* into  
448 the  $\Delta fitAB\Delta emtB\Delta fhuB$  triple mutant. Finally, the quintuple mutant was isolated by conjugation  
449 of pCJK-*efaCBA* (31) into the quadruple mutant. All gene deletions were confirmed by PCR  
450 sequencing of the insertion site and flanking region.

451

452 **RNA analysis.** Total RNA was isolated from *E. faecalis* OG1RF cells grown to mid-log phase in  
453 FMC[+Fe] or FMC[-Fe] or grown to mid-log phase in FMC[+Fe] and transferred to FMC[-Fe]  
454 following the methods described elsewhere (80). The RNA was precipitated with ice-cold  
455 isopropanol and 3 M sodium acetate (pH 5) at 4°C before RNA pellets were suspended in  
456 nuclease-free H<sub>2</sub>O and treated with DNase I (Ambion) for 30 min at 37°C. Then, ~ 100 µg of  
457 RNA per sample was further purified using the RNeasy kit (Qiagen), which includes a second

458 on-column DNase digestion. Sample quality and quantity were assessed on an Agilent 2100  
459 Bioanalyzer at the University of Florida Interdisciplinary Center for Biotechnology Research (UF-  
460 ICBR). Messenger RNA (5 µg total RNA per sample) was enriched using a MICROBExpress  
461 bacterial mRNA purification kit (Thermo Fisher) and cDNA libraries containing unique barcodes  
462 generated from 100 ng mRNA using the Next Ultrall Directional RNA Library Prep kit for Illumina  
463 (New England Biolabs). The individual cDNA libraries were assessed for quality and quantity by  
464 Qubit, diluted to 10 nM each and equimolar amounts of cDNA pooled together. The pooled  
465 cDNA libraries were subjected to deep sequencing at the UF-ICBR using the Illumina NextSeq  
466 500 platform. Read mapping was performed on a Galaxy server hosted by the University of  
467 Florida Research Computer using Map with Bowtie for Illumina and the *E. faecalis* OG1RF  
468 genome (GenBank accession no. NC\_017316.1) used as reference. The reads per open reading  
469 frame were tabulated with htseq-count. Final comparisons between bacteria grown in FMC[+Fe]  
470 and FMC[-Fe] were performed with Degust (<http://degust.erc.monash.edu/>), with a false-  
471 discovery rate (FDR) of 0.05 and after applying a 2-fold change cutoff.

472

473 **ICP-OES.** Trace metal content in bacteria or growth media was determined by inductively  
474 coupled plasma-optical emission spectrometry (ICP-OES). For quantification of trace metals in  
475 the different media used, 18 ml of prepared media (BHI, FMC or LM-FMC) were digested with 2  
476 ml trace-metal grade 35% HNO<sub>3</sub> at 90°C for 1 hour. For intracellular metal quantification, cell  
477 pellets from overnight BHI cultures were washed once in 0.5 mM EDTA and twice in trace-metal  
478 grade PBS to remove extracellular metals and diluted 1:50 in LM-FMC with or without iron or  
479 heme supplementation as described in the results section. Cultures were grown aerobically at  
480 37°C to an OD<sub>600</sub> 0.4, the cell pellets collected by centrifugation, washed once in 0.5 mM EDTA  
481 and twice in trace metal grade PBS to remove extracellular metals. A 10 ml aliquot of  
482 resuspended cell pellet was saved for total protein quantification and 40 ml of the suspension  
483 used for metal quantification. For this, cell suspensions were digested in 2 ml 35% HNO<sub>3</sub> at

484 90°C for 1 hour, and the digested suspension diluted 1:10 in reagent-grade H<sub>2</sub>O. Metal content  
485 was determined using a 5300DV ICP Atomic Emission Spectrometer (Perkin Elmer) at the  
486 University of Florida Institute of Food and Agricultural Sciences Analytical Services  
487 Laboratories, and the data normalized to total protein content that was determined by the  
488 bicinchoninic acid (BCA) assay (Sigma).

489

490 **<sup>55</sup>Fe uptake.** For <sup>55</sup>Fe uptake experiments, nitrocellulose membranes were pre-wet in 1 M  
491 NiSO<sub>4</sub> solution to prevent nonspecific binding of <sup>55</sup>Fe (Perkin-Elmer) to the membranes.  
492 Overnight cultures of *E. faecalis* parent and mutant strains grown in LM-FMC[-Fe] were diluted  
493 30-fold in LM-FMC[-Fe], and grown to mid-log phase (OD<sub>600</sub> ~0.5), at which point 10 μM <sup>55</sup>Fe  
494 was added to each culture and incubated at 37°C. At 0, 15, 30, and 60 minutes, 200 μl aliquots  
495 were transferred to the pre-wet nitrocellulose membrane placed in a slot blot apparatus. Free  
496 <sup>55</sup>Fe was removed by four washes with 100 mM sodium citrate buffer using vacuum filtration.  
497 The membranes were air dried, cut, and dissolved in 4 ml scintillation counter cocktail.  
498 Radioactivity was measured by scintillation with “wide open” window setting using a Beckmann  
499 LSC6000 scintillation counter. The count per million (cpm) values from <sup>55</sup>Fe free cells were  
500 obtained and subtracted from the cpm of treated cells. The efficiency of the machine was  
501 ~30.8% and was used to convert cpm to disintegrations per minute (dpm), which was then  
502 converted to molarity and normalized to CFU.

503

504 **Intracellular heme quantification.** Cultures were grown under the same conditions used for  
505 trace metal quantifications by ICP-OES. After washing in trace-metal grade PBS, pellets were  
506 suspended in 1ml DMSO and lysed using a bead beater. Cellular heme was determined using  
507 the acidified chloroform extraction method following the protocols detailed elsewhere (29).  
508 Absorbance of the organic phases at 388, 450, and 330 nm were determined using a  
509 GENESYS™ 30 Visible Spectrophotometer (ThermoScientific™). Heme content was

510 determined by plugging absorbance values of samples and heme standards into the correction  
511 equation  $A_c = 2 \times A_{388} - (A_{450} + A_{330})$  and were normalized by total protein content.

512

513 **Growth in human serum.** Blood from B<sup>+</sup> healthy donors was obtained from LifeSouth  
514 Community Blood Centers in Gainesville, Florida (IRB 202100899). Each experiment was  
515 performed with pooled serum isolated from blood of 3 individual donors. Where indicated, serum  
516 was supplemented with 10 μM FeSO<sub>4</sub> or 10 μM heme. After overnight incubation in BHI at 37°C,  
517 cell pellets were collected, washed once in 0.5 mM EDTA in trace metal grade PBS, twice in  
518 trace metal grade PBS, and sub-cultured into serum at  $\sim 1.5 \times 10^6$  CFU ml<sup>-1</sup> with constant  
519 rotation at 37°C. Total CFU at selected intervals was determined by serial dilution and plated on  
520 tryptic soy agar (TSA) containing 200 μg ml<sup>-1</sup> rifampicin and 10 μg ml<sup>-1</sup> fusidic acid.

521

522 **Galleria mellonella infection.** Larvae of *G. mellonella* was used to assess virulence of parent  
523 and selected mutants as previously described (31). Briefly, groups of 20 larvae (200–300 mg in  
524 weight) were injected with 5 μl of bacterial inoculum containing  $\sim 5 \times 10^5$  CFU. To investigate the  
525 impact of exogenous heme supplementation, larvae were injected with either trace metal grade  
526 PBS or 50 pmol heme one hour prior to infection. Larvae injected with heat-  
527 inactivated *E. faecalis* OG1RF (30 min at 100°C), 50 pmol heme, or PBS were used as controls.  
528 After infection, larvae were kept at 37°C and their survival monitored for up to 96 hours.

529

530 **Mouse intraperitoneal infection.** These experiments were performed under protocol  
531 202200000241 approved by the University of Florida Institutional Animal Care and Use  
532 Committee (IACUC). The mouse peritonitis infection model has been described previously (43)  
533 such that only a brief overview of the model is provided below. To prepare the bacterial  
534 inoculum, bacteria were grown in BHI to an OD<sub>600</sub> of 0.5, the cells pellets collected, washed  
535 once in 0.5 mM EDTA and twice in trace metal grade PBS, and suspended in PBS at  $\sim 2 \times 10^8$

536 CFU ml<sup>-1</sup>. Seven-week-old C57BL6J mice purchased from Jackson laboratories were  
537 intraperitoneally injected with 1 ml of bacterial suspension and euthanized by CO<sub>2</sub> asphyxiation  
538 48-h post-infection. The abdomen was opened to expose the peritoneal lining, 5 ml of cold PBS  
539 injected into the peritoneal cavity with 4 ml retrieved as the peritoneal wash. Quantification of  
540 bacteria within the peritoneal wash was determined by plating serial dilutions on TSA containing  
541 200 µg ml<sup>-1</sup> rifampicin and 10 µg ml<sup>-1</sup> fusidic acid. For bacterial enumeration inside spleens,  
542 spleens were surgically removed, briefly washed in 70% ethanol followed by rinsing in sterile  
543 PBS, homogenized in 1 ml PBS, serially diluted, and plated on selective TSA plates.

544

545 **Mouse wound infection.** These experiments were performed under protocol 202011154  
546 approved by the University of Florida IACUC. The bacterial inoculum was prepared as  
547 described for the peritonitis model, but cell pellets were concentrated to 1 x 10<sup>10</sup> CFU ml<sup>-1</sup> and  
548 stored on ice until infection. Seven-week old C57BL6J mice purchased from Jackson  
549 laboratories were anesthetized using isoflurane, their backs shaved, and the incision wound  
550 created using a 6mm biopsy punch. Wounds were infected with 10 µl of culture and covered  
551 with Tegaderm™ dressing. 72 hours post infection, mice were euthanized by CO<sub>2</sub> asphyxiation,  
552 the wounds were excised, and the wounds homogenized in 1 ml PBS. The wound homogenates  
553 were serially diluted and plated on selective TSA plates.

554

555 **Acknowledgements.** This study was supported by NIH-NIAID R21 AI137446 to J.A.L. D.N.B.  
556 was supported by NIH-NIDCR Training Grant T90 DE021990 and by American Heart  
557 Association Pre-doctoral Fellowship 907592.

558

559 **Data availability.** Gene expression data have been deposited in the NCBI Gene Expression  
560 Omnibus (GEO) database (<https://www.ncbi.nlm.nih.gov/geo>). The GEO Series accession  
561 number is pending.

562

563

564

565

566

## 567 **REFERENCES**

- 568 1. Magill SS, O'Leary E, Edwards JR, Emerging Infections Program Healthcare-Associated I,  
569 Antimicrobial Use Hospital Prevalence Survey T. Changes in Prevalence of Health Care-Associated  
570 Infections. Reply. *N Engl J Med*. 2019;380(11):1085-6. Epub 2019/03/14. doi: 10.1056/NEJMc1817140.  
571 PubMed PMID: 30865811; PMCID: PMC7976444.
- 572 2. Solomon SL, Oliver KB. Antibiotic resistance threats in the United States: stepping back from the  
573 brink. *Am Fam Physician*. 2014;89(12):938-41. Epub 2014/08/28. PubMed PMID: 25162160.
- 574 3. Arias CA, Murray BE. The rise of the Enterococcus: beyond vancomycin resistance. *Nat Rev*  
575 *Microbiol*. 2012;10(4):266-78. Epub 2012/03/17. doi: 10.1038/nrmicro2761. PubMed PMID: 22421879;  
576 PMCID: PMC3621121.
- 577 4. Gaca AO, Lemos JA. Adaptation to Adversity: the Intermingling of Stress Tolerance and  
578 Pathogenesis in Enterococci. *Microbiol Mol Biol Rev*. 2019;83(3). Epub 2019/07/19. doi:  
579 10.1128/MMBR.00008-19. PubMed PMID: 31315902; PMCID: PMC6710459.
- 580 5. Kao PHN, Kline KA. Dr. Jekyll and Mr. Hide: How Enterococcus faecalis Subverts the Host  
581 Immune Response to Cause Infection. *J Mol Biol*. 2019;431(16):2932-45. Epub 2019/05/28. doi:  
582 10.1016/j.jmb.2019.05.030. PubMed PMID: 31132360.
- 583 6. Begg SL. The role of metal ions in the virulence and viability of bacterial pathogens. *Biochem Soc*  
584 *Trans*. 2019;47(1):77-87. Epub 2019/01/11. doi: 10.1042/BST20180275. PubMed PMID: 30626704.
- 585 7. Chandrangsu P, Rensing C, Helmann JD. Metal homeostasis and resistance in bacteria. *Nat Rev*  
586 *Microbiol*. 2017;15(6):338-50. Epub 2017/03/28. doi: 10.1038/nrmicro.2017.15. PubMed PMID:  
587 28344348; PMCID: PMC5963929.
- 588 8. Becker KW, Skaar EP. Metal limitation and toxicity at the interface between host and pathogen.  
589 *FEMS Microbiol Rev*. 2014;38(6):1235-49. Epub 2014/09/12. doi: 10.1111/1574-6976.12087. PubMed  
590 PMID: 25211180; PMCID: PMC4227937.
- 591 9. Kehl-Fie TE, Skaar EP. Nutritional immunity beyond iron: a role for manganese and zinc. *Curr*  
592 *Opin Chem Biol*. 2010;14(2):218-24. Epub 2009/12/18. doi: 10.1016/j.cbpa.2009.11.008. PubMed PMID:  
593 20015678; PMCID: PMC2847644.
- 594 10. Nairz M, Dichtl S, Schroll A, Haschka D, Tymoszek P, Theurl I, Weiss G. Iron and innate  
595 antimicrobial immunity-Depriving the pathogen, defending the host. *J Trace Elem Med Biol*.  
596 2018;48:118-33. Epub 2018/05/19. doi: 10.1016/j.jtemb.2018.03.007. PubMed PMID: 29773170.
- 597 11. Dev S, Babitt JL. Overview of iron metabolism in health and disease. *Hemodial Int*. 2017;21 Suppl  
598 1:S6-S20. Epub 2017/03/16. doi: 10.1111/hdi.12542. PubMed PMID: 28296010; PMCID: PMC5977983.



- 599 12. Pantopoulos K, Porwal SK, Tartakoff A, Devireddy L. Mechanisms of mammalian iron  
600 homeostasis. *Biochemistry*. 2012;51(29):5705-24. Epub 2012/06/19. doi: 10.1021/bi300752r. PubMed  
601 PMID: 22703180; PMCID: PMC3572738.
- 602 13. Vogt AS, Arsiwala T, Mohsen M, Vogel M, Manolova V, Bachmann MF. On Iron Metabolism and  
603 Its Regulation. *Int J Mol Sci*. 2021;22(9). Epub 2021/05/01. doi: 10.3390/ijms22094591. PubMed PMID:  
604 33925597; PMCID: PMC8123811.
- 605 14. Cassat JE, Skaar EP. Iron in infection and immunity. *Cell Host Microbe*. 2013;13(5):509-19. Epub  
606 2013/05/21. doi: 10.1016/j.chom.2013.04.010. PubMed PMID: 23684303; PMCID: PMC3676888.
- 607 15. Wang J, Pantopoulos K. Regulation of cellular iron metabolism. *Biochem J*. 2011;434(3):365-81.  
608 Epub 2011/02/26. doi: 10.1042/BJ20101825. PubMed PMID: 21348856; PMCID: PMC3048577.
- 609 16. Hao L, Shan Q, Wei J, Ma F, Sun P. Lactoferrin: Major Physiological Functions and Applications.  
610 *Curr Protein Pept Sci*. 2019;20(2):139-44. Epub 2018/05/15. doi:  
611 10.2174/1389203719666180514150921. PubMed PMID: 29756573.
- 612 17. Zygiel EM, Nolan EM. Exploring Iron Withholding by the Innate Immune Protein Human  
613 Calprotectin. *Acc Chem Res*. 2019;52(8):2301-8. Epub 2019/08/06. doi: 10.1021/acs.accounts.9b00250.  
614 PubMed PMID: 31381301; PMCID: PMC6702060.
- 615 18. Lopez CA, Skaar EP. The Impact of Dietary Transition Metals on Host-Bacterial Interactions. *Cell*  
616 *Host Microbe*. 2018;23(6):737-48. Epub 2018/06/15. doi: 10.1016/j.chom.2018.05.008. PubMed PMID:  
617 29902439; PMCID: PMC6007885.
- 618 19. Ratledge C, Dover LG. Iron metabolism in pathogenic bacteria. *Annu Rev Microbiol*.  
619 2000;54:881-941. doi: DOI 10.1146/annurev.micro.54.1.881. PubMed PMID: WOS:000165272300028.
- 620 20. Braun V, Hantke K. Recent insights into iron import by bacteria. *Curr Opin Chem Biol*.  
621 2011;15(2):328-34. Epub 2011/02/01. doi: 10.1016/j.cbpa.2011.01.005. PubMed PMID: 21277822.
- 622 21. Sheldon JR, Heinrichs DE. Recent developments in understanding the iron acquisition strategies  
623 of gram positive pathogens. *FEMS Microbiol Rev*. 2015;39(4):592-630. Epub 2015/04/12. doi:  
624 10.1093/femsre/fuv009. PubMed PMID: 25862688.
- 625 22. Palmer LD, Skaar EP. Transition Metals and Virulence in Bacteria. *Annu Rev Genet*. 2016;50:67-  
626 91. Epub 2016/09/13. doi: 10.1146/annurev-genet-120215-035146. PubMed PMID: 27617971; PMCID:  
627 PMC5125913.
- 628 23. Nairz M, Haschka D, Demetz E, Weiss G. Iron at the interface of immunity and infection. *Front*  
629 *Pharmacol*. 2014;5:152. Epub 2014/08/01. doi: 10.3389/fphar.2014.00152. PubMed PMID: 25076907;  
630 PMCID: PMC4100575.
- 631 24. Wilson BR, Bogdan AR, Miyazawa M, Hashimoto K, Tsuji Y. Siderophores in Iron Metabolism:  
632 From Mechanism to Therapy Potential. *Trends Mol Med*. 2016;22(12):1077-90. Epub 2016/11/09. doi:  
633 10.1016/j.molmed.2016.10.005. PubMed PMID: 27825668; PMCID: PMC5135587.
- 634 25. Cook-Libin S, Sykes EME, Kornelsen V, Kumar A. Iron Acquisition Mechanisms and Their Role in  
635 the Virulence of *Acinetobacter baumannii*. *Infect Immun*. 2022:e0022322. Epub 2022/09/07. doi:  
636 10.1128/iai.00223-22. PubMed PMID: 36066263.
- 637 26. Jones CM, Niederweis M. *Mycobacterium tuberculosis* can utilize heme as an iron source. *J*  
638 *Bacteriol*. 2011;193(7):1767-70. Epub 2011/02/08. doi: 10.1128/JB.01312-10. PubMed PMID: 21296960;  
639 PMCID: PMC3067660.
- 640 27. Jochim A, Adolf L, Belikova D, Schilling NA, Setyawati I, Chin D, Meyers S, Verhamme P, Heinrichs  
641 DE, Slotboom DJ, Heilbronner S. An ECF-type transporter scavenges heme to overcome iron-limitation in  
642 *Staphylococcus lugdunensis*. *Elife*. 2020;9. Epub 2020/06/10. doi: 10.7554/eLife.57322. PubMed PMID:  
643 32515736; PMCID: PMC7299338.
- 644 28. Contreras H, Chim N, Credali A, Goulding CW. Heme uptake in bacterial pathogens. *Curr Opin*  
645 *Chem Biol*. 2014;19:34-41. Epub 2014/05/02. doi: 10.1016/j.cbpa.2013.12.014. PubMed PMID:  
646 24780277; PMCID: PMC4007353.



- 647 29. Chatterjee N, Cook LCC, Lyles KV, Nguyen HAT, Devlin DJ, Thomas LS, Eichenbaum Z. A Novel  
648 Heme Transporter from the Energy Coupling Factor Family Is Vital for Group A Streptococcus  
649 Colonization and Infections. *J Bacteriol.* 2020;202(14). Epub 2020/05/13. doi: 10.1128/JB.00205-20.  
650 PubMed PMID: 32393520; PMCID: PMC7317044.
- 651 30. Han R, Niu M, Liu S, Mao J, Yu Y, Du Y. The effect of siderophore virulence genes entB and ybtS  
652 on the virulence of Carbapenem-resistant *Klebsiella pneumoniae*. *Microb Pathog.* 2022;171:105746.  
653 Epub 2022/09/06. doi: 10.1016/j.micpath.2022.105746. PubMed PMID: 36064103.
- 654 31. Colomer-Winter C, Flores-Mireles AL, Baker SP, Frank KL, Lynch AJL, Hultgren SJ, Kitten T, Lemos  
655 JA. Manganese acquisition is essential for virulence of *Enterococcus faecalis*. *PLoS Pathog.*  
656 2018;14(9):e1007102. Epub 2018/09/21. doi: 10.1371/journal.ppat.1007102. PubMed PMID: 30235334;  
657 PMCID: PMC6147510.
- 658 32. Lam LN, Brunson DN, Molina JJ, Flores-Mireles AL, Lemos JA. The AdcACB/AdcAll system is  
659 essential for zinc homeostasis and an important contributor of *Enterococcus faecalis* virulence.  
660 *Virulence.* 2022;13(1):592-608. Epub 2022/03/29. doi: 10.1080/21505594.2022.2056965. PubMed  
661 PMID: 35341449; PMCID: PMC8966984.
- 662 33. Latorre M, Quenti D, Travisany D, Singh KV, Murray BE, Maass A, Cambiazio V. The Role of Fur in  
663 the Transcriptional and Iron Homeostatic Response of *Enterococcus faecalis*. *Front Microbiol.*  
664 2018;9:1580. Epub 2018/08/02. doi: 10.3389/fmicb.2018.01580. PubMed PMID: 30065712; PMCID:  
665 PMC6056675.
- 666 34. Lopez G, Latorre M, Reyes-Jara A, Cambiazio V, Gonzalez M. Transcriptomic response of  
667 *Enterococcus faecalis* to iron excess. *Biometals.* 2012;25(4):737-47. Epub 2012/03/27. doi:  
668 10.1007/s10534-012-9539-5. PubMed PMID: 22447126.
- 669 35. Latorre M, Galloway-Pena J, Roh JH, Budinich M, Reyes-Jara A, Murray BE, Maass A, Gonzalez M.  
670 *Enterococcus faecalis* reconfigures its transcriptional regulatory network activation at different copper  
671 levels. *Metallomics.* 2014;6(3):572-81. Epub 2014/01/03. doi: 10.1039/c3mt00288h. PubMed PMID:  
672 24382465; PMCID: PMC4131723.
- 673 36. Terleckyj B, Willett NP, Shockman GD. Growth of several cariogenic strains of oral streptococci in  
674 a chemically defined medium. *Infect Immun.* 1975;11(4):649-55. Epub 1975/04/01. doi:  
675 10.1128/iai.11.4.649-655.1975. PubMed PMID: 1091546; PMCID: PMC415117.
- 676 37. Zawadzka AM, Kim Y, Maltseva N, Nichiporuk R, Fan Y, Joachimiak A, Raymond KN.  
677 Characterization of a *Bacillus subtilis* transporter for petrobactin, an anthrax stealth siderophore. *Proc*  
678 *Natl Acad Sci U S A.* 2009;106(51):21854-9. Epub 2009/12/04. doi: 10.1073/pnas.0904793106. PubMed  
679 PMID: 19955416; PMCID: PMC2799803.
- 680 38. Low YL, Jakubovics NS, Flatman JC, Jenkinson HF, Smith AW. Manganese-dependent regulation  
681 of the endocarditis-associated virulence factor EfaA of *Enterococcus faecalis*. *J Med Microbiol.*  
682 2003;52(Pt 2):113-9. Epub 2003/01/25. doi: 10.1099/jmm.0.05039-0. PubMed PMID: 12543916.
- 683 39. Bergin D, Murphy L, Keenan J, Clynes M, Kavanagh K. Pre-exposure to yeast protects larvae of  
684 *Galleria mellonella* from a subsequent lethal infection by *Candida albicans* and is mediated by the  
685 increased expression of antimicrobial peptides. *Microbes Infect.* 2006;8(8):2105-12. Epub 2006/06/20.  
686 doi: 10.1016/j.micinf.2006.03.005. PubMed PMID: 16782387.
- 687 40. Kelly J, Kavanagh K. Caspofungin primes the immune response of the larvae of *Galleria*  
688 *mellonella* and induces a non-specific antimicrobial response. *J Med Microbiol.* 2011;60(Pt 2):189-96.  
689 Epub 2010/10/16. doi: 10.1099/jmm.0.025494-0. PubMed PMID: 20947665.
- 690 41. Zimmer DB, Eubanks JO, Ramakrishnan D, Criscitiello MF. Evolution of the S100 family of calcium  
691 sensor proteins. *Cell Calcium.* 2013;53(3):170-9. Epub 2012/12/19. doi: 10.1016/j.ceca.2012.11.006.  
692 PubMed PMID: 23246155.
- 693 42. Verneuil N, Rince A, Sanguinetti M, Posteraro B, Fadda G, Auffray Y, Hartke A, Giard JC.  
694 Contribution of a PerR-like regulator to the oxidative-stress response and virulence of *Enterococcus*

- 695 faecalis. *Microbiology*. 2005;151(Pt 12):3997-4004. Epub 2005/12/13. doi: 10.1099/mic.0.28325-0.  
696 PubMed PMID: 16339944.
- 697 43. Kajfasz JK, Mendoza JE, Gaca AO, Miller JH, Koselny KA, Giambiagi-Demarval M, Wellington M,  
698 Abranches J, Lemos JA. The Spx regulator modulates stress responses and virulence in *Enterococcus*  
699 faecalis. *Infect Immun*. 2012;80(7):2265-75. Epub 2012/04/18. doi: 10.1128/IAI.00026-12. PubMed  
700 PMID: 22508863; PMCID: PMC3416481.
- 701 44. Muller C, Cacaci M, Sauvageot N, Sanguinetti M, Rattei T, Eder T, Giard JC, Kalinowski J, Hain T,  
702 Hartke A. The Intraperitoneal Transcriptome of the Opportunistic Pathogen *Enterococcus faecalis* in  
703 Mice. *PLoS One*. 2015;10(5):e0126143. Epub 2015/05/16. doi: 10.1371/journal.pone.0126143. PubMed  
704 PMID: 25978463; PMCID: PMC4433114.
- 705 45. Yang H, Kundra S, Chojnacki M, Liu K, Fuse MA, Abouelhassan Y, Kallifidas D, Zhang P, Huang G,  
706 Jin S, Ding Y, Luesch H, Rohde KH, Dunman PM, Lemos JA, Huigens RW, 3rd. A Modular Synthetic Route  
707 Involving N-Aryl-2-nitrosoaniline Intermediates Leads to a New Series of 3-Substituted Halogenated  
708 Phenazine Antibacterial Agents. *J Med Chem*. 2021;64(11):7275-95. Epub 2021/04/22. doi:  
709 10.1021/acs.jmedchem.1c00168. PubMed PMID: 33881312; PMCID: PMC8192493.
- 710 46. Choby JE, Skaar EP. Heme Synthesis and Acquisition in Bacterial Pathogens. *J Mol Biol*.  
711 2016;428(17):3408-28. Epub 2016/03/29. doi: 10.1016/j.jmb.2016.03.018. PubMed PMID: 27019298;  
712 PMCID: PMC5125930.
- 713 47. Ouattara M, Cunha EB, Li X, Huang YS, Dixon D, Eichenbaum Z. Shr of group A streptococcus is a  
714 new type of composite NEAT protein involved in sequestering haem from methaemoglobin. *Mol*  
715 *Microbiol*. 2010;78(3):739-56. Epub 2010/09/03. doi: 10.1111/j.1365-2958.2010.07367.x. PubMed  
716 PMID: 20807204; PMCID: PMC2963705.
- 717 48. Brugna M, Tasse L, Hederstedt L. In vivo production of catalase containing haem analogues.  
718 *FEBS J*. 2010;277(12):2663-72. Epub 2010/06/18. doi: 10.1111/j.1742-464X.2010.07677.x. PubMed  
719 PMID: 20553500.
- 720 49. Spirig T, Malmirchegini GR, Zhang J, Robson SA, Sjodt M, Liu M, Krishna Kumar K, Dickson CF,  
721 Gell DA, Lei B, Loo JA, Clubb RT. *Staphylococcus aureus* uses a novel multidomain receptor to break  
722 apart human hemoglobin and steal its heme. *J Biol Chem*. 2013;288(2):1065-78. Epub 2012/11/08. doi:  
723 10.1074/jbc.M112.419119. PubMed PMID: 23132864; PMCID: PMC3542992.
- 724 50. Frankenberg L, Brugna M, Hederstedt L. *Enterococcus faecalis* Heme-Dependent Catalase.  
725 *Journal of Bacteriology*. 2002;184(22):6351-6. doi: 10.1128/jb.184.22.6351-6356.2002.
- 726 51. Baureder M, Hederstedt L. Genes important for catalase activity in *Enterococcus faecalis*. *PLoS*  
727 *One*. 2012;7(5):e36725. Epub 2012/05/17. doi: 10.1371/journal.pone.0036725. PubMed PMID:  
728 22590595; PMCID: PMC3349705.
- 729 52. Winstedt L, Frankenberg L, Hederstedt L, von Wachenfeldt C. *Enterococcus faecalis* V583  
730 contains a cytochrome bd-type respiratory oxidase. *J Bacteriol*. 2000;182(13):3863-6. Epub 2000/06/13.  
731 doi: 10.1128/JB.182.13.3863-3866.2000. PubMed PMID: 10851008; PMCID: PMC94564.
- 732 53. Saillant V, Lipuma D, Ostyn E, Joubert L, Boussac A, Guerin H, Brandelet G, Arnoux P, Lechardeur  
733 D. A Novel *Enterococcus faecalis* Heme Transport Regulator (FhtR) Senses Host Heme To Control Its  
734 Intracellular Homeostasis. *mBio*. 2021;12(1). Epub 2021/02/04. doi: 10.1128/mBio.03392-20. PubMed  
735 PMID: 33531389; PMCID: PMC7858072.
- 736 54. Coates CJ, Nairn J. Diverse immune functions of hemocyanins. *Dev Comp Immunol*.  
737 2014;45(1):43-55. Epub 2014/02/04. doi: 10.1016/j.dci.2014.01.021. PubMed PMID: 24486681.
- 738 55. Liu M, Huang M, Huang L, Biville F, Zhu D, Wang M, Jia R, Chen S, Zhao X, Yang Q, Wu Y, Zhang S,  
739 Huang J, Tian B, Chen X, Liu Y, Zhang L, Yu Y, Pan L, Ur Rehman M, Cheng A. New Perspectives on *Galleria*  
740 *mellonella* Larvae as a Host Model Using *Riemerella anatipestifer* as a Proof of Concept. *Infect Immun*.  
741 2019;87(8). Epub 2019/06/05. doi: 10.1128/IAI.00072-19. PubMed PMID: 31160365; PMCID:  
742 PMC6652747.

- 743 56. Ge R, Sun X. Iron acquisition and regulation systems in *Streptococcus* species. *Metallomics*.  
744 2014;6(5):996-1003. Epub 2014/03/26. doi: 10.1039/c4mt00011k. PubMed PMID: 24663493.
- 745 57. Lisiecki P, Wysocki P, Mikucki J. Occurrence of siderophores in enterococci. *Zentralbl Bakteriol*.  
746 2000;289(8):807-15. Epub 2000/03/08. doi: 10.1016/s0934-8840(00)80006-7. PubMed PMID: 10705612.
- 747 58. Sobis-Glinkowska M, Mikucki J, Lisiecki P. [Hydroxamate siderophore effect on growth of  
748 enterococci]. *Med Dosw Mikrobiol*. 2001;53(1):1-7. Epub 2002/01/05. PubMed PMID: 11757399.
- 749 59. Lisiecki P, Mikucki J. [Citric acid as a siderophore of enterococci?]. *Med Dosw Mikrobiol*.  
750 2004;56(1):29-40. Epub 2004/11/05. PubMed PMID: 15524394.
- 751 60. Schwyn B, Neilands JB. Universal chemical assay for the detection and determination of  
752 siderophores. *Anal Biochem*. 1987;160(1):47-56. Epub 1987/01/01. doi: 10.1016/0003-2697(87)90612-9.  
753 PubMed PMID: 2952030.
- 754 61. Keogh D, Lam LN, Doyle LE, Matysik A, Pavagadhi S, Umashankar S, Low PM, Dale JL, Song Y, Ng  
755 SP, Boothroyd CB, Dunny GM, Swarup S, Williams RBH, Marsili E, Kline KA. Extracellular Electron Transfer  
756 Powers *Enterococcus faecalis* Biofilm Metabolism. *mBio*. 2018;9(2). Epub 2018/04/11. doi:  
757 10.1128/mBio.00626-17. PubMed PMID: 29636430; PMCID: PMC5893876.
- 758 62. Marcelis JH, den Daas-Slagt HJ, Hoogkamp-Korstanje JA. Iron requirement and chelator  
759 production of staphylococci, *Streptococcus faecalis* and enterobacteriaceae. *Antonie Van Leeuwenhoek*.  
760 1978;44(3-4):257-67. Epub 1978/01/01. doi: 10.1007/BF00394304. PubMed PMID: 110252.
- 761 63. Vebo HC, Snipen L, Nes IF, Brede DA. The transcriptome of the nosocomial pathogen  
762 *Enterococcus faecalis* V583 reveals adaptive responses to growth in blood. *PLoS One*. 2009;4(11):e7660.  
763 Epub 2009/11/06. doi: 10.1371/journal.pone.0007660. PubMed PMID: 19888459; PMCID: PMC2766626.
- 764 64. Vebo HC, Solheim M, Snipen L, Nes IF, Brede DA. Comparative genomic analysis of pathogenic  
765 and probiotic *Enterococcus faecalis* isolates, and their transcriptional responses to growth in human  
766 urine. *PLoS One*. 2010;5(8):e12489. Epub 2010/09/09. doi: 10.1371/journal.pone.0012489. PubMed  
767 PMID: 20824220; PMCID: PMC2930860.
- 768 65. Frank KL, Colomer-Winter C, Grindle SM, Lemos JA, Schlievert PM, Dunny GM. Transcriptome  
769 analysis of *Enterococcus faecalis* during mammalian infection shows cells undergo adaptation and exist  
770 in a stringent response state. *PLoS One*. 2014;9(12):e115839. Epub 2014/12/30. doi:  
771 10.1371/journal.pone.0115839. PubMed PMID: 25545155; PMCID: PMC4278851.
- 772 66. Abrantes MC, Kok J, Lopes Mde F. EfaR is a major regulator of *Enterococcus faecalis* manganese  
773 transporters and influences processes involved in host colonization and infection. *Infect Immun*.  
774 2013;81(3):935-44. Epub 2013/01/09. doi: 10.1128/IAI.06377-11. PubMed PMID: 23297382; PMCID:  
775 PMC3584879.
- 776 67. Pi H, Helmann JD. Sequential induction of Fur-regulated genes in response to iron limitation in  
777 *Bacillus subtilis*. *Proc Natl Acad Sci U S A*. 2017;114(48):12785-90. Epub 2017/11/15. doi:  
778 10.1073/pnas.1713008114. PubMed PMID: 29133393; PMCID: PMC5715773.
- 779 68. Jakubovics NS. An ion for an iron: streptococcal metal homeostasis under oxidative stress.  
780 *Biochem J*. 2019;476(4):699-703. Epub 2019/03/02. doi: 10.1042/BCJ20190017. PubMed PMID:  
781 30819932.
- 782 69. Romero-Saavedra F, Laverde D, Budin-Verneuil A, Muller C, Bernay B, Benachour A, Hartke A,  
783 Huebner J. Characterization of Two Metal Binding Lipoproteins as Vaccine Candidates for Enterococcal  
784 Infections. *PLoS One*. 2015;10(8):e0136625. Epub 2015/09/01. doi: 10.1371/journal.pone.0136625.  
785 PubMed PMID: 26322633; PMCID: PMC4556446.
- 786 70. Obaidullah AJ, Ahmed MH, Kitten T, Kellogg GE. Inhibiting Pneumococcal Surface Antigen A  
787 (PsaA) with Small Molecules Discovered through Virtual Screening: Steps toward Validating a Potential  
788 Target for *Streptococcus pneumoniae*. *Chem Biodivers*. 2018;15(12):e1800234. Epub 2018/09/18. doi:  
789 10.1002/cbdv.201800234. PubMed PMID: 30221472.

- 790 71. Lau CK, Krewulak KD, Vogel HJ. Bacterial ferrous iron transport: the Feo system. *FEMS Microbiol*  
791 *Rev.* 2016;40(2):273-98. Epub 2015/12/20. doi: 10.1093/femsre/fuv049. PubMed PMID: 26684538.
- 792 72. Sebulsky MT, Hohnstein D, Hunter MD, Heinrichs DE. Identification and characterization of a  
793 membrane permease involved in iron-hydroxamate transport in *Staphylococcus aureus*. *J Bacteriol.*  
794 2000;182(16):4394-400. Epub 2000/07/27. doi: 10.1128/JB.182.16.4394-4400.2000. PubMed PMID:  
795 10913070; PMCID: PMC94608.
- 796 73. Grigg JC, Ukpabi G, Gaudin CF, Murphy ME. Structural biology of heme binding in the  
797 *Staphylococcus aureus* Isd system. *J Inorg Biochem.* 2010;104(3):341-8. Epub 2009/10/27. doi:  
798 10.1016/j.jinorgbio.2009.09.012. PubMed PMID: 19853304.
- 799 74. Montanez GE, Neely MN, Eichenbaum Z. The streptococcal iron uptake (Siu) transporter is  
800 required for iron uptake and virulence in a zebrafish infection model. *Microbiology.* 2005;151(Pt  
801 11):3749-57. Epub 2005/11/08. doi: 10.1099/mic.0.28075-0. PubMed PMID: 16272396.
- 802 75. Morgenthau A, Livingstone M, Adamiak P, Schryvers AB. The role of lactoferrin binding protein B  
803 in mediating protection against human lactoferricin. *Biochem Cell Biol.* 2012;90(3):417-23. Epub  
804 2012/02/16. doi: 10.1139/o11-074. PubMed PMID: 22332888.
- 805 76. Bryan-Jones DG, Whittenbury R. Haematin-dependent oxidative phosphorylation in  
806 *Streptococcus faecalis*. *J Gen Microbiol.* 1969;58(2):247-60. Epub 1969/10/01. doi: 10.1099/00221287-  
807 58-2-247. PubMed PMID: 4391229.
- 808 77. Holyoake LV, Poole RK, Shepherd M. The CydDC Family of Transporters and Their Roles in  
809 Oxidase Assembly and Homeostasis. *Adv Microb Physiol.* 2015;66:1-53. Epub 2015/07/27. doi:  
810 10.1016/bs.ampbs.2015.04.002. PubMed PMID: 26210105.
- 811 78. Pittman MS, Corker H, Wu G, Binet MB, Moir AJ, Poole RK. Cysteine is exported from the  
812 *Escherichia coli* cytoplasm by CydDC, an ATP-binding cassette-type transporter required for cytochrome  
813 assembly. *J Biol Chem.* 2002;277(51):49841-9. Epub 2002/10/24. doi: 10.1074/jbc.M205615200.  
814 PubMed PMID: 12393891.
- 815 79. Ch'ng JH, Muthu M, Chong KKL, Wong JJ, Tan CAZ, Koh ZJS, Lopez D, Matysik A, Nair ZJ, Barkham  
816 T, Wang Y, Kline KA. Heme cross-feeding can augment *Staphylococcus aureus* and *Enterococcus faecalis*  
817 dual species biofilms. *ISME J.* 2022. Epub 2022/05/20. doi: 10.1038/s41396-022-01248-1. PubMed  
818 PMID: 35589966.
- 819 80. Kajfasz JK, Katrak C, Ganguly T, Vargas J, Wright L, Peters ZT, Spatafora GA, Abranches J, Lemos  
820 JA. Manganese Uptake, Mediated by SloABC and MntH, Is Essential for the Fitness of *Streptococcus*  
821 *mutans*. *mSphere.* 2020;5(1). Epub 2020/01/10. doi: 10.1128/mSphere.00764-19. PubMed PMID:  
822 31915219; PMCID: PMC6952196.
- 823 81. Kristich CJ, Manias DA, Dunny GM. Development of a method for markerless genetic exchange  
824 in *Enterococcus faecalis* and its use in construction of a *srtA* mutant. *Appl Environ Microbiol.*  
825 2005;71(10):5837-49. Epub 2005/10/06. doi: 10.1128/AEM.71.10.5837-5849.2005. PubMed PMID:  
826 16204495; PMCID: PMC1265997.

827  
828

829 **TABLE 1** Iron and manganese quantifications in the media used in this study.

| Media                  | Fe (µM)            | Mn (µM)             |
|------------------------|--------------------|---------------------|
| FMC                    | 80.02 (+/- 10.123) | 118.401 (+/-16.265) |
| FMC [-Fe]              | 0.052 (+/-0.008)   | 109.881 (+/-6.870)  |
| FMC Low-Metal (FMC-LM) | 10.538 (+/- 0.829) | 10.414 (+/-0.807)   |
| FMC-LM [-Fe]           | 0.002 (+/-0.0048)  | 14.853 (+/-3.362)   |
| FMC [-Fe/-Mn]          | 0.0376(+/-0.103)   | 0.0413 (+/-0.0215)  |
| FMC [-Fe/+heme]        | 4.584 (+/-0.182)   | 11.992 (+/-3.811)   |
| BHI                    | 6.581 (+/- 0.950)  | 0.570 (+/-0.0208)   |

830

831 **TABLE 2** Strains of *E. faecalis* and *E. faecium* used in this study.

| Strains                                                                          | Relevant Characteristics                                                                                        | Source         |
|----------------------------------------------------------------------------------|-----------------------------------------------------------------------------------------------------------------|----------------|
| <b><i>E. faecalis</i></b>                                                        |                                                                                                                 |                |
| OG1RF                                                                            | Rif <sup>R</sup> Fus <sup>R</sup>                                                                               | Lab collection |
| V583                                                                             | Van <sup>R</sup> clinical isolate                                                                               | Lab collection |
| 555-05                                                                           | Clinical isolate                                                                                                | Lab collection |
| $\Delta fitAB$                                                                   | <i>fitAB</i> deletion                                                                                           | This study     |
| $\Delta emtB$                                                                    | <i>emtB</i> deletion                                                                                            | This study     |
| $\Delta fitAB\Delta emtB$                                                        | <i>fitAB</i> deletion; <i>emtB</i> deletion                                                                     | This study     |
| $\Delta feoB\Delta fhuB\Delta fitAB\Delta emtB$                                  | <i>feoB</i> deletion; <i>fhuB</i> deletion; <i>fitAB</i> deletion; <i>emtB</i> deletion                         | This study     |
| $\Delta efaCBA\Delta feoB\Delta fhuB\Delta fitAB\Delta emtB$<br>( $\Delta 5Fe$ ) | <i>efaCBA</i> deletion; <i>feoB</i> deletion; <i>fhuB</i> deletion; <i>fitAB</i> deletion; <i>emtB</i> deletion | This study     |

|                                 |                                                                               |                |
|---------------------------------|-------------------------------------------------------------------------------|----------------|
| CK111                           | OG1S <i>upp4::P23repA4</i> , Spec <sup>R</sup> .<br>Conjugation donor strain. | (81)           |
| <b><u><i>E. faecium</i></u></b> |                                                                               |                |
| 19634                           |                                                                               | Lab collection |
| 791-05                          | Clinical isolate                                                              | Lab collection |
| 824-05                          | Clinical isolate                                                              | Lab collection |

832

833



834 **FIGURE LEGENDS**

835 **FIG 1** Growth of *E. faecalis* and *E. faecium* strains in FMC[+Fe] or FMC[-Fe]. Growth was  
836 monitored by measuring OD<sub>600</sub> every 30 minutes using an automated growth reader. Error bars  
837 denote standard deviations from three independent biological replicates.

838

839 **FIG 2** Summary of RNA-Seq analysis comparing *E. faecalis* grown under iron depleted versus  
840 iron replete conditions. Dot plot of genes differently expressed, via RNA sequencing, under  
841 conditions of iron depletion as determined by Degust (degust.erc.monash.edu). The y axis  
842 indicates the fold change in expression compared to control cultures, while the x axis indicates  
843 position within the genome.

844

845 **FIG 3** Genetic organization of FitABCD (A) and EmtABC (B) and homologues found in selected  
846 Gram-positive bacteria. Percentage of amino acid identity and positive identity to OG1RF for  
847 substrate binding protein, permease, and ATPase are indicated.

848

849 **FIG 4** Phylogenetic tree analysis of the substrate binding proteins FitD (A) and EmtC (B).  
850 BLASTP searches against FitD and EmtC were used to identify homologues across species of  
851 enterococci, streptococci, bacilli, and other Gram-positive bacteria. Phylogenetic trees were  
852 constructed using multiple sequence alignments of representative species using Clustal Omega  
853 and iTOL.

854

855 **FIG 5** Growth of OG1RF,  $\Delta fitAB$ ,  $\Delta emtB$ ,  $\Delta fitAB\Delta emtB$ , and  $\Delta 5Fe$  in (A) BHI, (B) FMC[+Fe], (C)  
856 FMC[-Fe], (D) LM-FMC[+Fe], (E) LM-FMC[-Fe], and (F) LM-FMC[-Fe/-Mn]. Growth was  
857 monitored by measuring OD<sub>600</sub> every 30 minutes using an automated growth reader. Error bars  
858 denote standard deviations from three biological replicates.

859

860 **FIG 6** Quantitative real time PCR analysis of iron transport genes transferred from iron replete  
861 (FMC[+Fe]) to iron depleted (FMC[-Fe]) conditions. Data shown represents four independent  
862 cultures with two technical replicates each. Line is set at 1 to indicate expression equivalent at  
863  $T_0$ . Significance was determined by one-way ANOVA using a Dunnett's post-hoc test to compare  
864 mRNA levels at  $T_0$  with  $T_{10}$ ,  $T_{30}$  and  $T_{60}$  time points. \*\*\* $p \leq 0.001$ , and \*\*\*\* $p \leq 0.0001$ .

865

866 **FIG 7** The  $\Delta 5Fe$  strain displays a major defect in iron acquisition. (A) ICP-OES analysis of  
867 intracellular iron content in OG1RF,  $\Delta fitAB$ ,  $\Delta emtB$ ,  $\Delta fitAB\Delta emtB$ , and  $\Delta 5Fe$  strains grown in  
868 iron replete (LM-FMC[+Fe]) or depleted (LM-FMC[-Fe]) media. (B)  $^{55}Fe$  uptake kinetics of  
869 OG1RF,  $\Delta fitAB\Delta emtB$  and  $\Delta 5Fe$  strains. Cells were grown in LM-FMC[-Fe] to mid-log phase  
870 and iron uptake monitored over time after addition of  $10\mu M$   $^{55}Fe$ . The results shown represent  
871 the average and standard deviation of five biological replicates for each data point. Significance  
872 was determined by two-way ANOVA followed by a Dunnett's post comparison test. \* $p \leq 0.05$ ,  
873 \*\* $p \leq 0.01$ , and \*\*\* $p \leq 0.001$ .

874

875 **FIG 8** The  $\Delta 5Fe$  strain displays defective growth/survival in human serum *ex vivo* and  
876 attenuated virulence in animal infection models. (A) Serum was obtained from blood pooled  
877 from 3 healthy donors, bacteria were inoculated into serum at  $1.5 \times 10^6$  CFU, incubated at  $37^\circ C$   
878 and growth/survival monitored for 48 hours. The experiment was repeated on four independent  
879 occasions with three bacterial biological replicates on each occasion. Error bars denote SEM  
880 and significance was determined using the Mann-Whitney U test. (B) Percent survival of  
881 *Galleria mellonella* infected with OG1RF,  $\Delta fitAB$ ,  $\Delta emtB$ ,  $\Delta fitAB\Delta emtB$ ,  $\Delta 5Fe$ , or heat killed  
882 OG1RF. Twenty larvae were infected with  $5 \times 10^5$  CFU of designated strains and incubated in  
883 the dark at  $37^\circ C$  to monitor survival over time. The Kaplan Meyer plot is a representative of  
884 three independent experiments. Significance was determined using the Mantel-Cox log-rank  
885 test. (C) Seven-week-old C57Bl6J mice were infected via intraperitoneal injection with  $2 \times 10^8$



886 CFU of the designated strain. At 48 hours post infection, mice were euthanized, and peritoneal  
887 washes and spleens collected for CFU determination. Mann-Whitney U test was used to  
888 determine significance. (D) Seven-week-old C57Bl6 mice were wounded with a 6 mm biopsy  
889 punch and infected with  $2 \times 10^8$  CFU of designated strains. At 3-days post infection, mice were  
890 euthanized, wounds extracted and homogenized for CFU determination. (C-D) Data points  
891 shown are a result of the ROUT outlier test and bars denote median values. Statistical analyses  
892 were performed using the Mann-Whitney test. \* $p \leq 0.05$ , \*\* $p \leq 0.01$ , and \*\*\*\* $p \leq 0.0001$ .

893

894 **FIG 9** Heme restores growth and virulence of the *E. faecalis*  $\Delta 5\text{Fe}$  strain in iron depleted  
895 environments. (A) Growth of strains OG1RF or  $\Delta 5\text{Fe}$  in LM-FMC[-Fe] with or without 10  $\mu\text{M}$   
896 heme supplementation. (B) Intracellular heme content determined from cultures grown to mid-  
897 log phase in LM-FMC[-Fe] with or without 10  $\mu\text{M}$  heme supplementation. Absorbances of and  
898 chloroform extract samples and heme standards were used in the correction equation  $A_c = 2$   
899  $\times A_{388} - (A_{450} + A_{330})$  and normalized to total protein content. (C) ICP-OES analysis of  
900 intracellular iron content of OG1RF and  $\Delta 5\text{Fe}$  strains grown in LM-FMC[-Fe] with or without  
901 heme supplementation. (B-C) Significance was determined by two-way ANOVA and a Dunnett's  
902 post comparison test. (D) 24-hours growth of OG1RF and  $\Delta 5\text{Fe}$  in fresh human serum with or  
903 without supplementation with 10  $\mu\text{M}$  iron or 10  $\mu\text{M}$  heme. The experiment was performed on two  
904 separate occasions with three bacterial biological replicates. Error bars denote SEM and  
905 significance was obtained using a 2way ANOVA with a Sidak's multiple comparison test. (E)  
906 Larvae of *G. mellonella* were injected with 50 pmol of heme or PBS 1 hour prior to infection with  
907 the OG1RF or  $\Delta 5\text{Fe}$  strains. Control group was injected with heat-killed (HK) OG1RF. Kaplan-  
908 Meyer curve shown is representative of six independent experiments with 20 larvae per  
909 experiment. Significance was determine using the Mantel-Cox log-rank test. \* $p \leq 0.05$ , \*\* $p \leq 0.01$ ,  
910 \*\*\* $p \leq 0.001$ , and \*\*\*\* $p \leq 0.0001$ .

911

912 **SUPPLEMENTAL FIGURE LEGENDS**

913 **FIG S1** Growth of OG1RF,  $\Delta feoB$ ,  $\Delta fhuB$ , and  $\Delta efaCBA$  in (A) BHI, (B) LM-FMC[+Fe], (C) LM-  
914 FMC[-Fe], and (D) LM-FMC[-Fe/-Mn]. Growth was monitored by measuring OD<sub>600</sub> every 30  
915 minutes using an automated growth reader. Error bars denote standard deviations from three  
916 biological replicates.

917 **FIG S2** Growth of  $\Delta fitAB\Delta emtB$ , and  $\Delta feoB\Delta fhuB\Delta fitAB\Delta emtB$  in (A) LM-FMC[+Fe] and (B)  
918 LM-FMC[-Fe]. Growth was monitored by measuring OD<sub>600</sub> every 30 minutes using an automated  
919 growth reader. Error bars denote standard deviations from three biological replicates.

920 **FIG S3** 24-hours growth of OG1RF,  $\Delta fitAB$ ,  $\Delta emtB$ ,  $\Delta fitAB\Delta emtB$ , and  $\Delta 5Fe$  in fresh human  
921 serum with. The experiment was performed on two separate occasions with three bacterial  
922 biological replicates. Error bars denote SEM and significance was obtained using a one-way  
923 ANOVA with a Holm-Šídák's multiple comparisons test.

***E. faecalis* OG1RF**

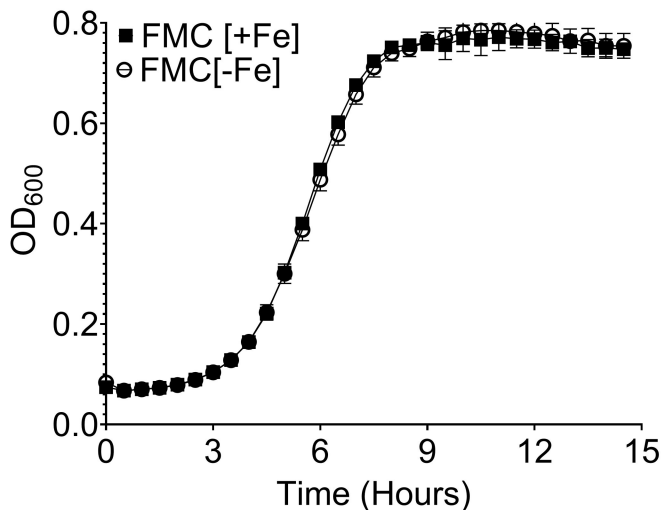

***E. faecium* 19634**

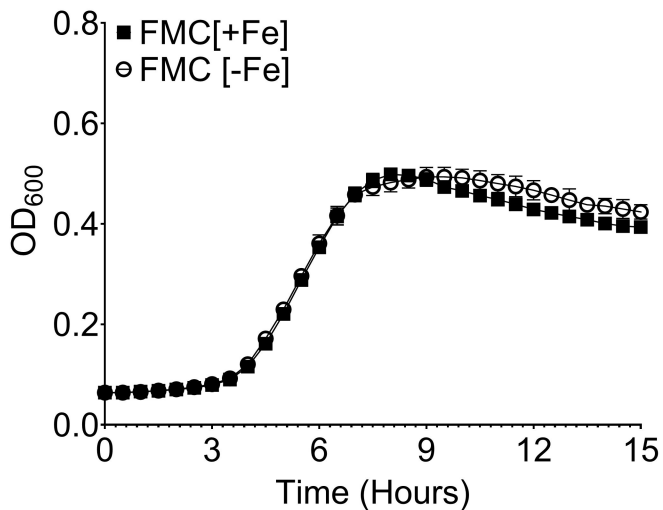

***E. faecalis* V583**

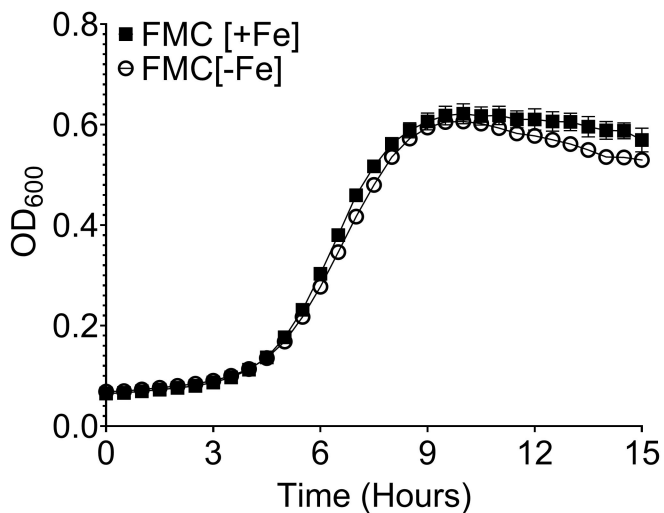

***E. faecium* 791-05**

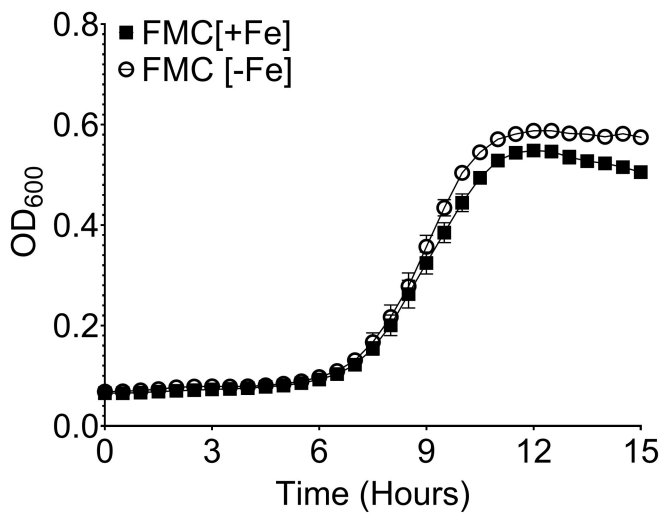

***E. faecalis* 555-05**

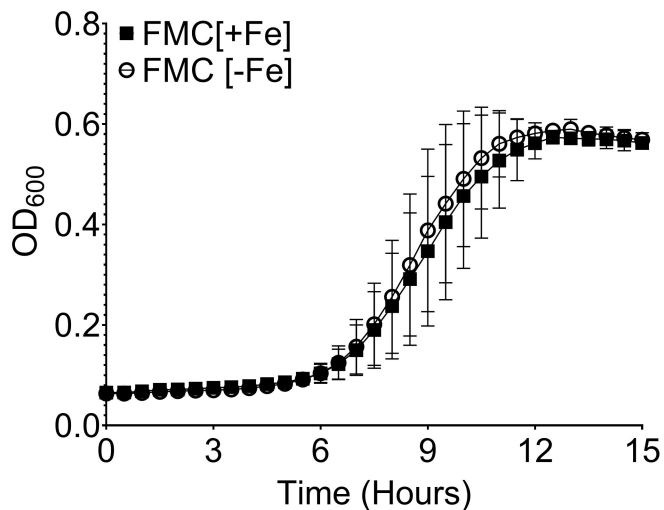

***E. faecium* 824-05**

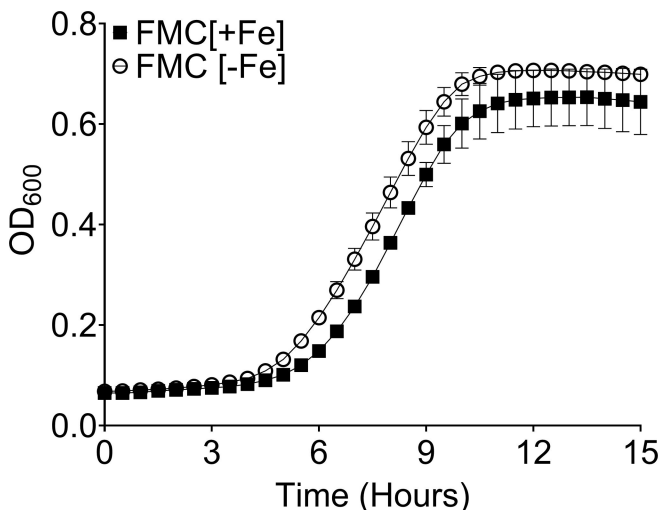

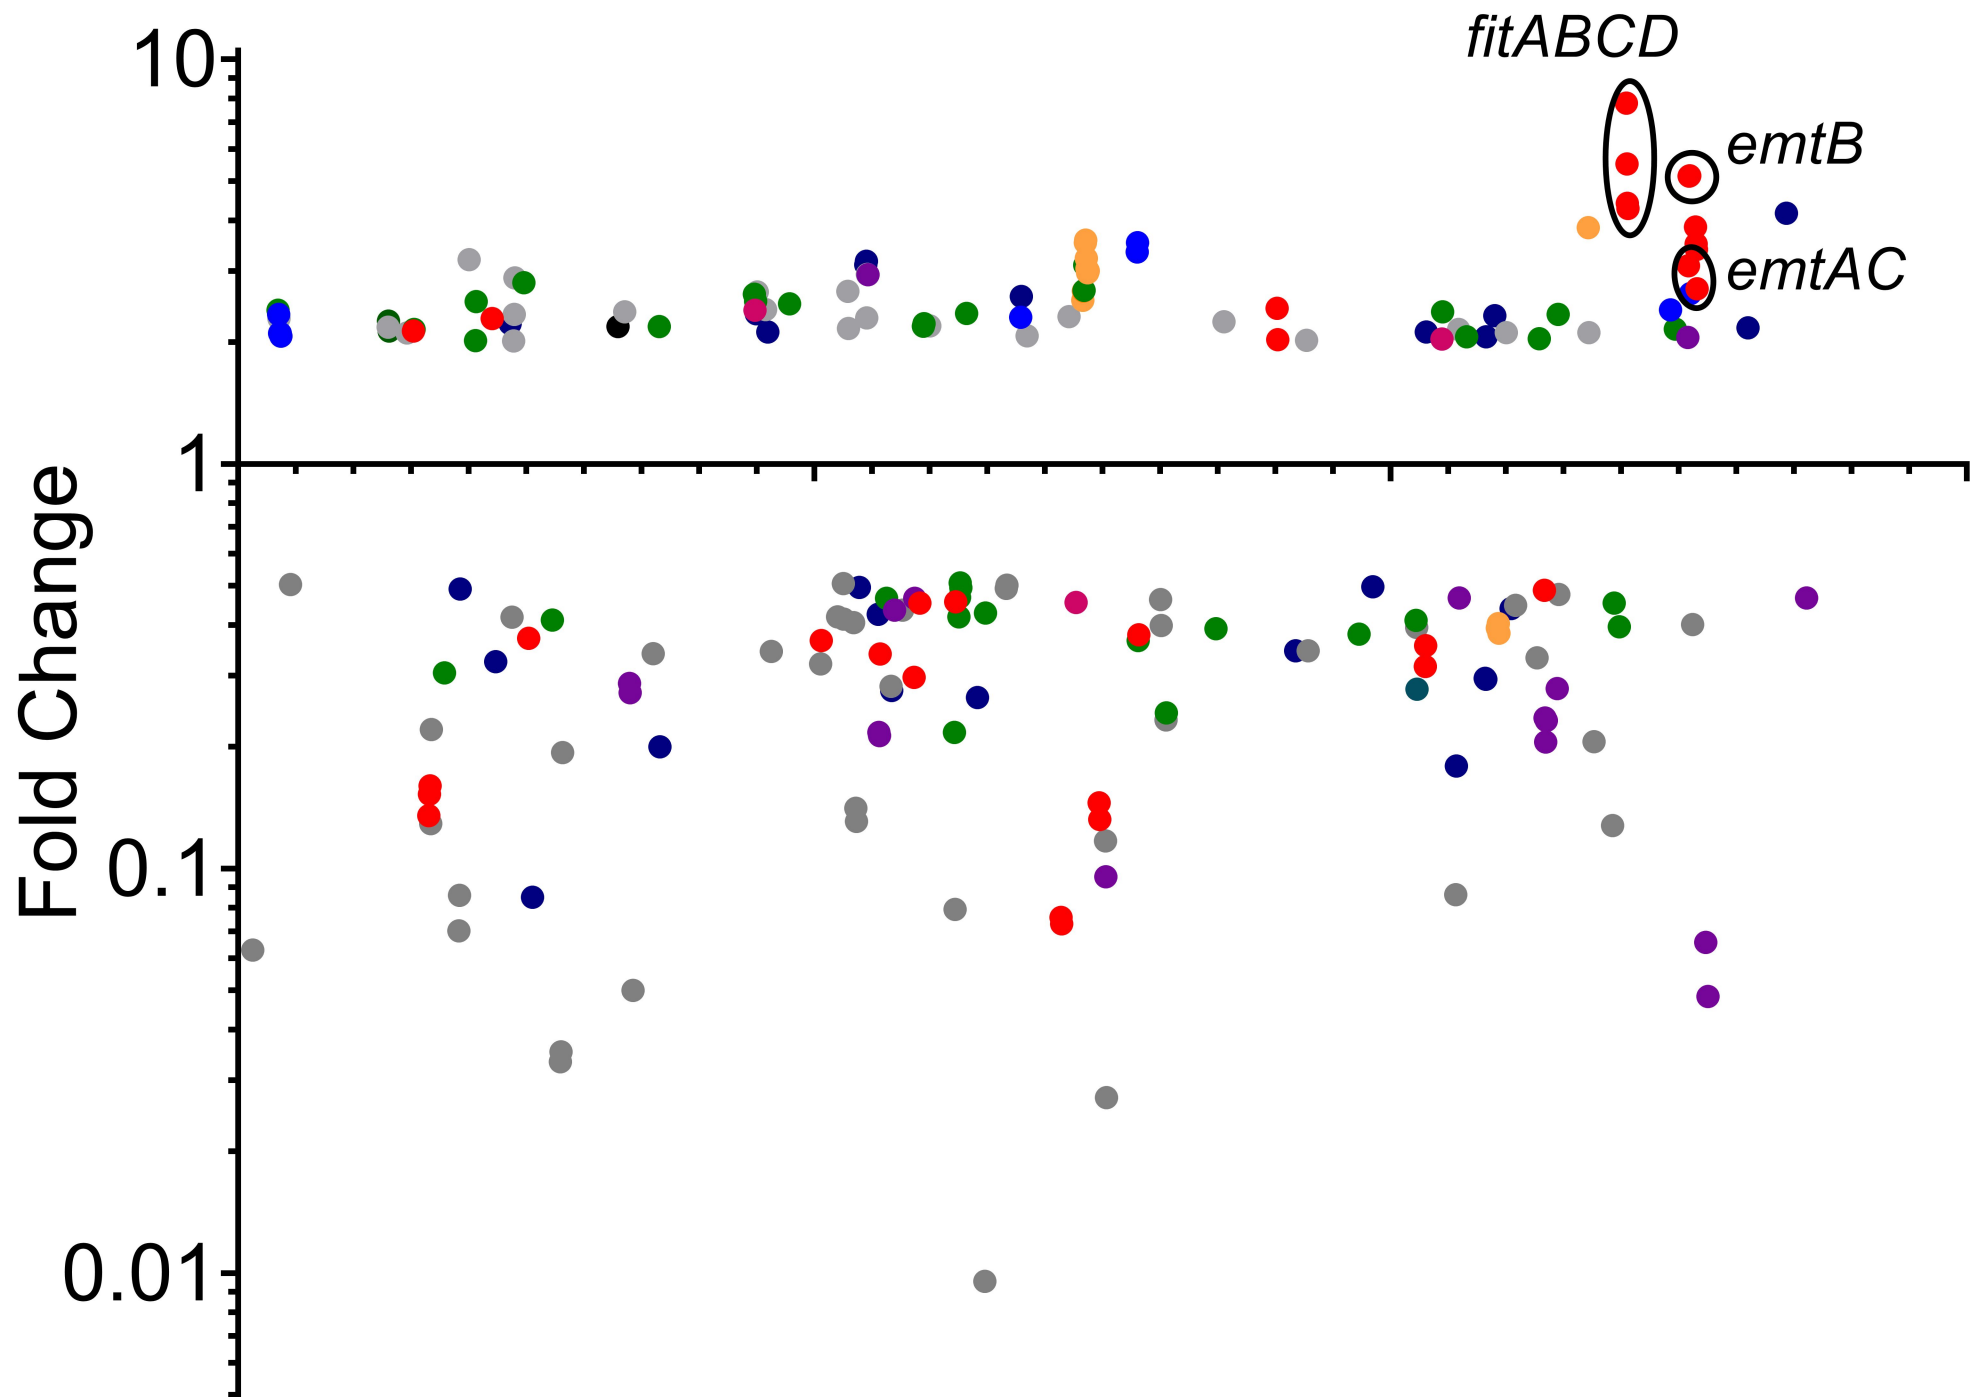

A

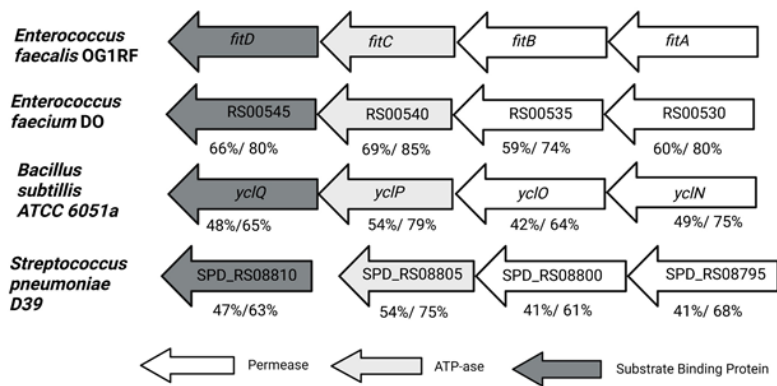

B

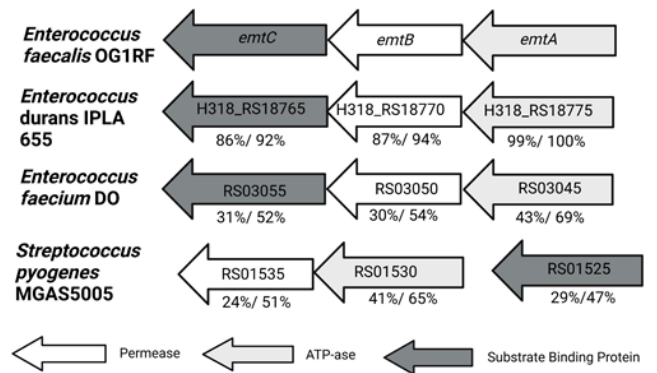

A

Tree scale: 0.1

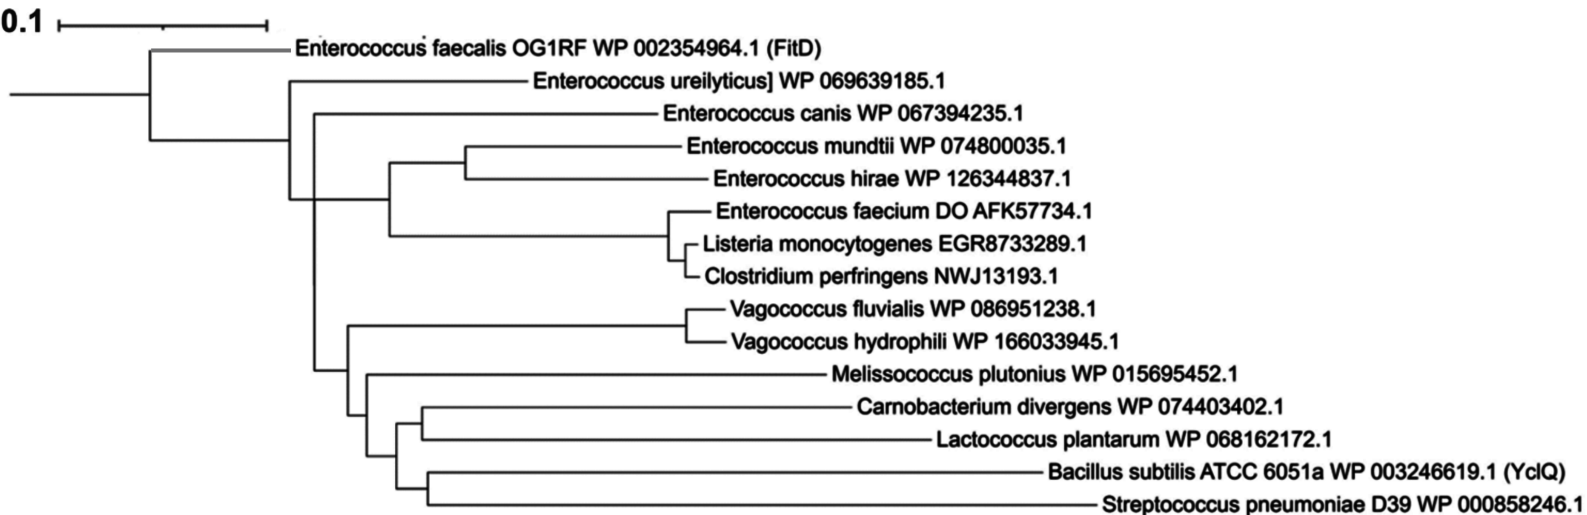

B

Tree scale: 0.1

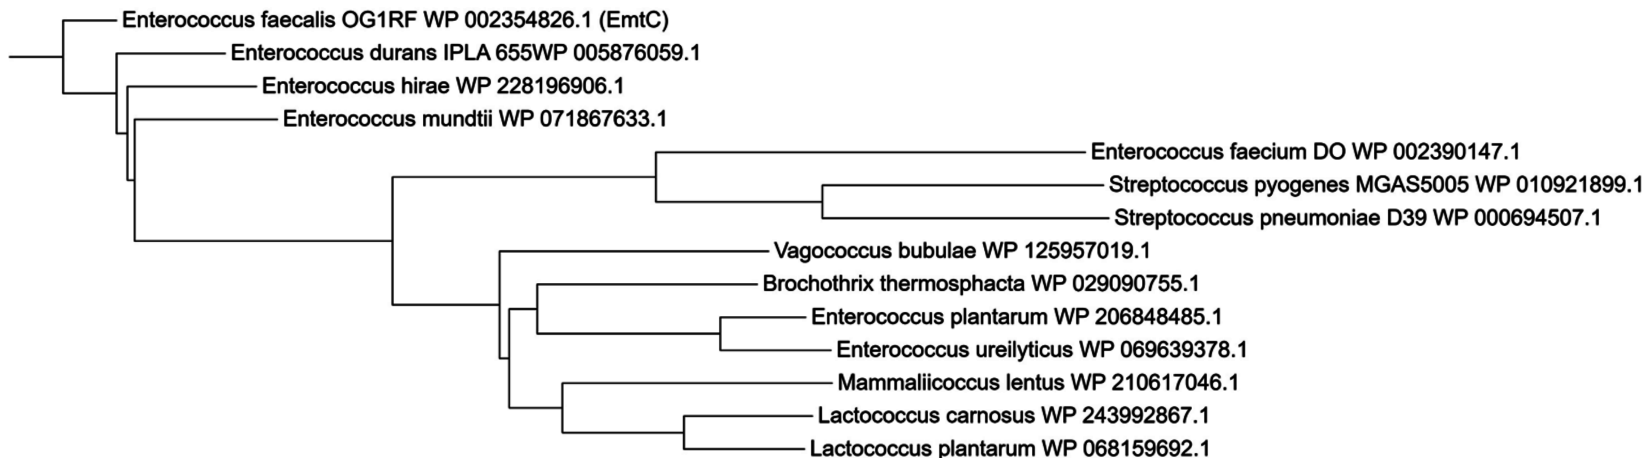

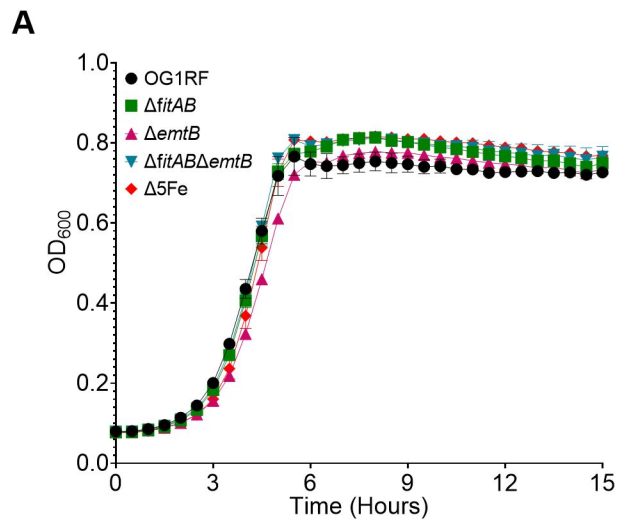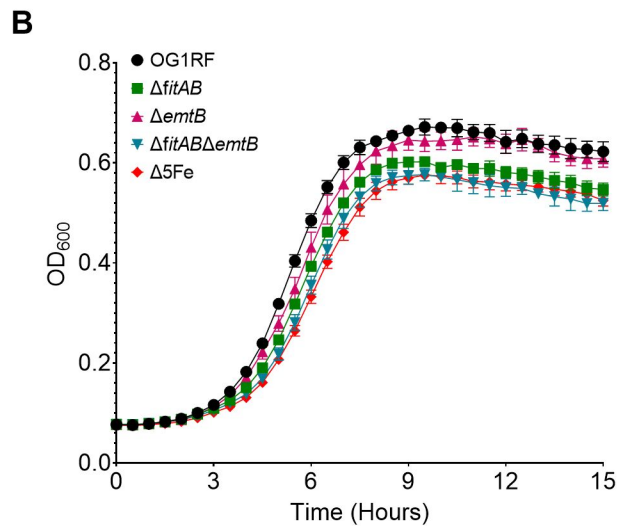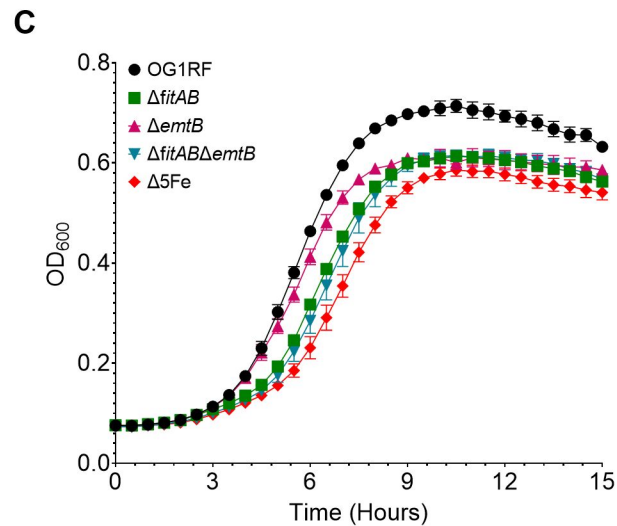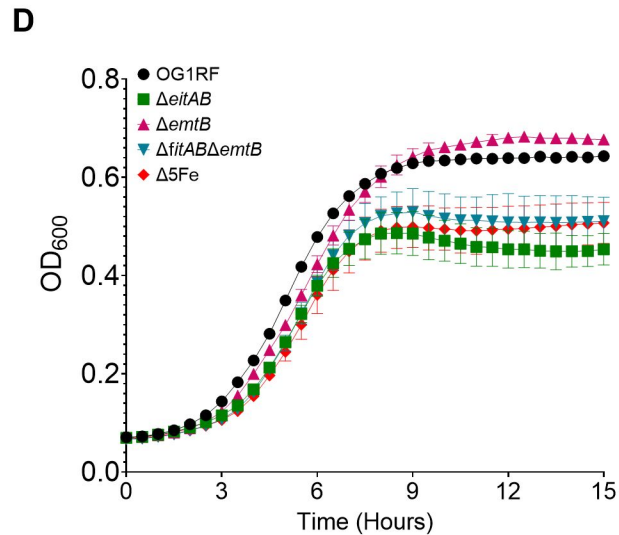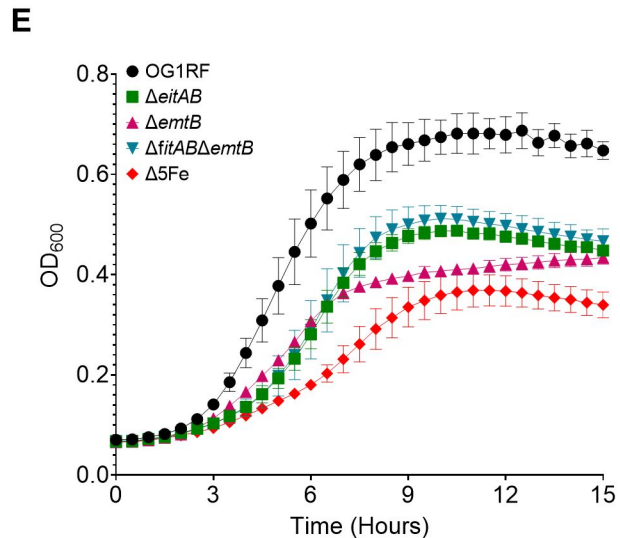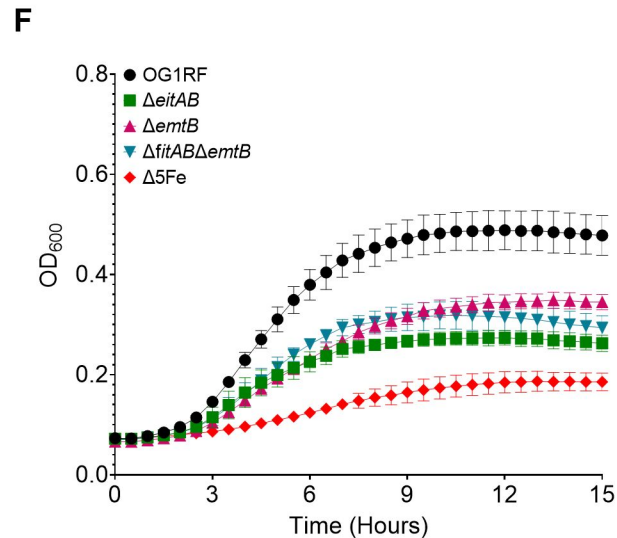

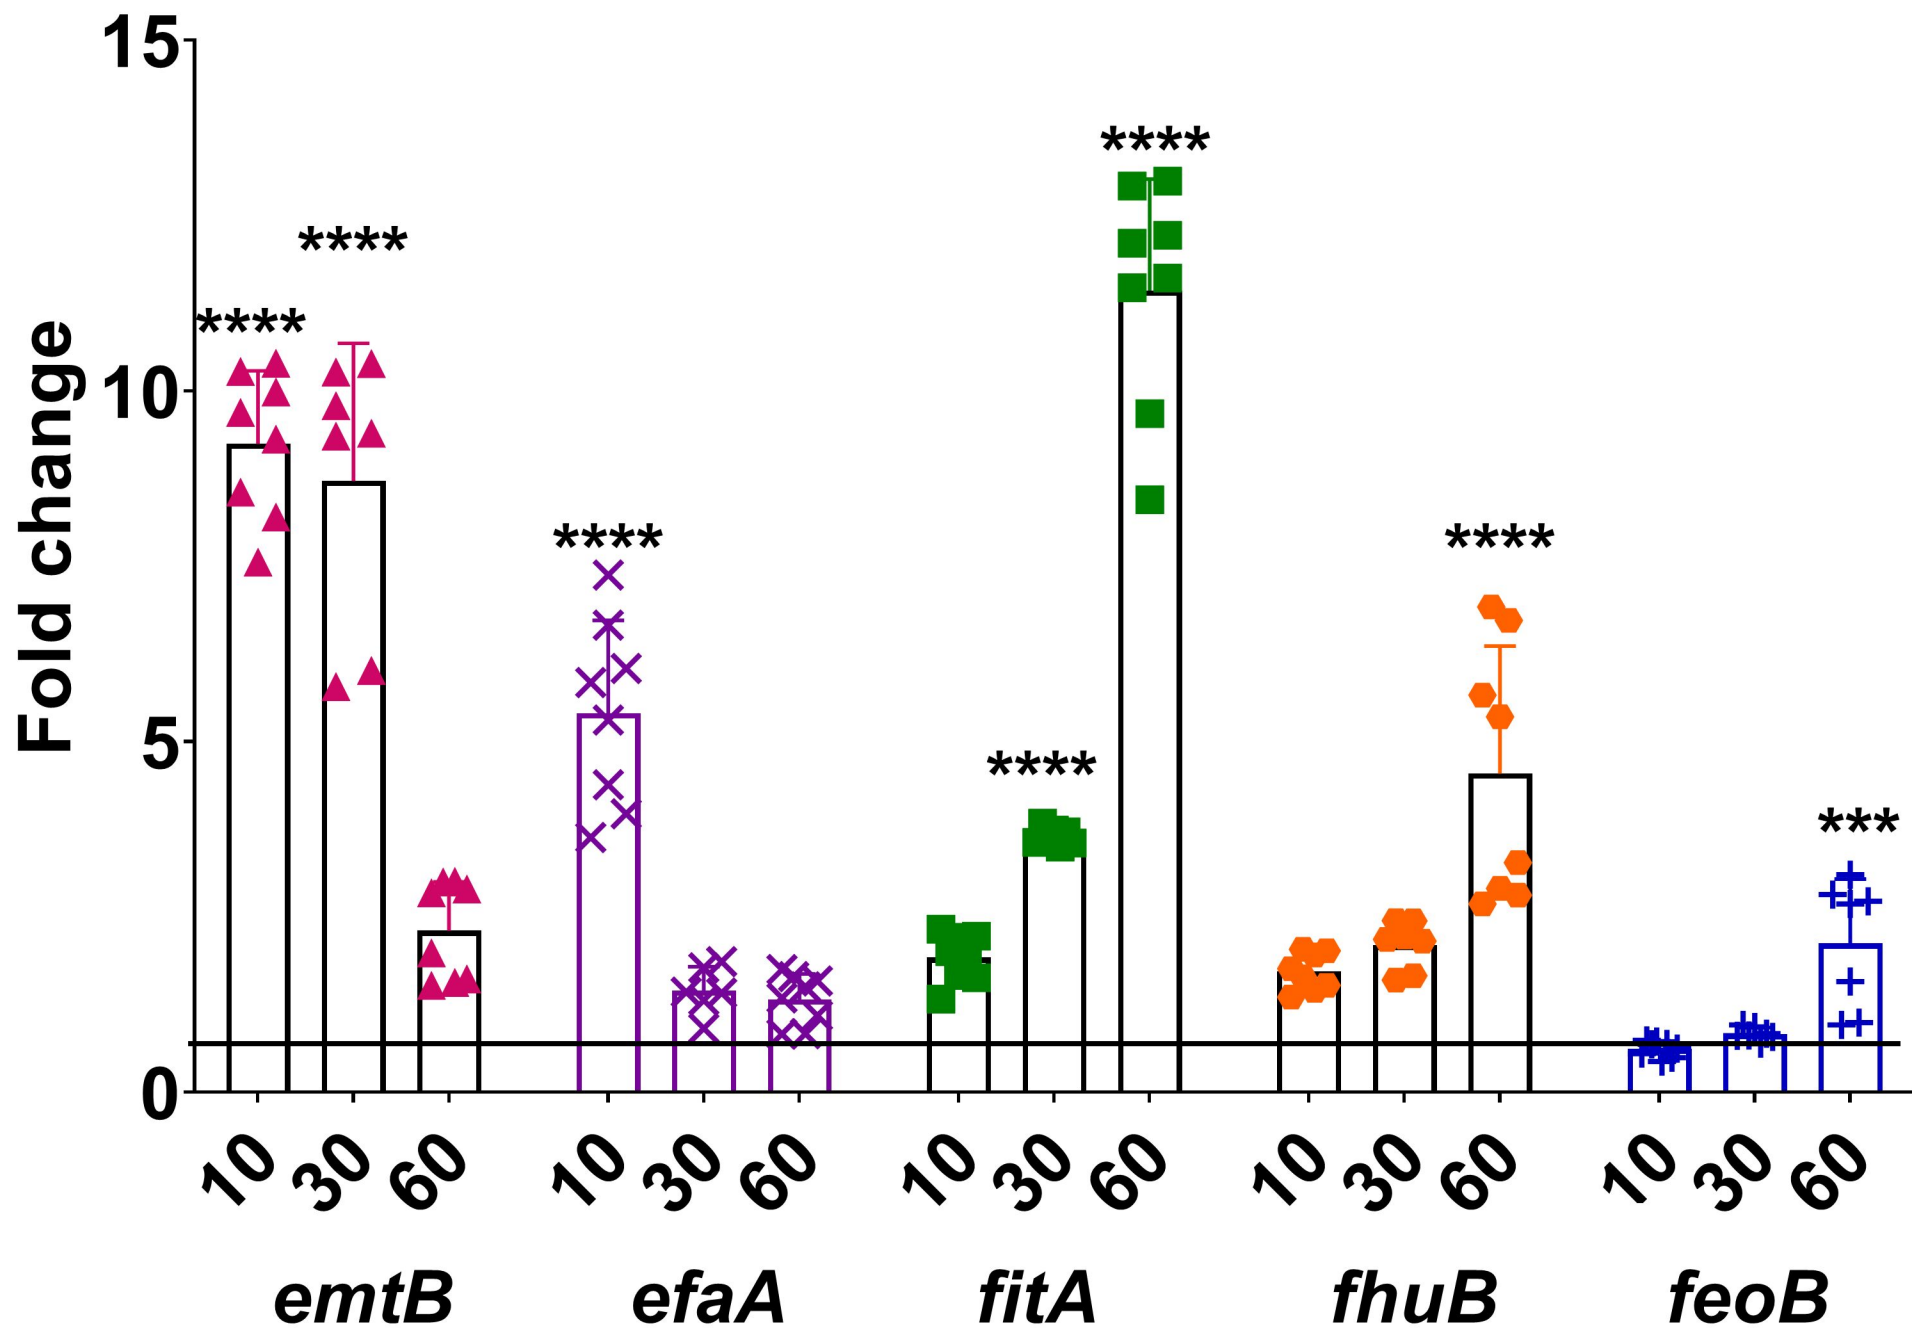



**A**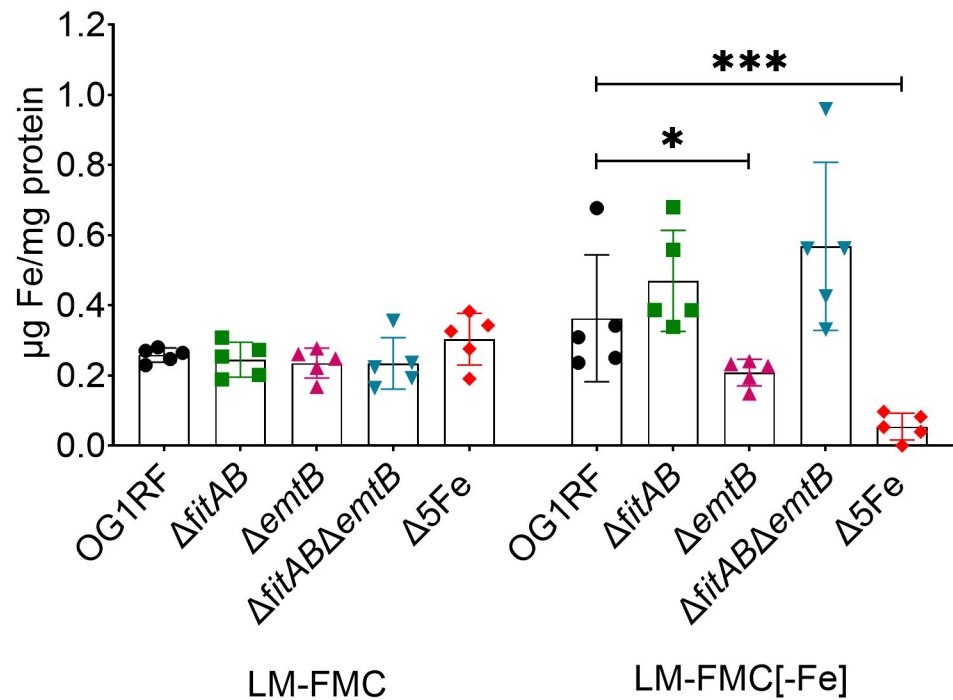**B**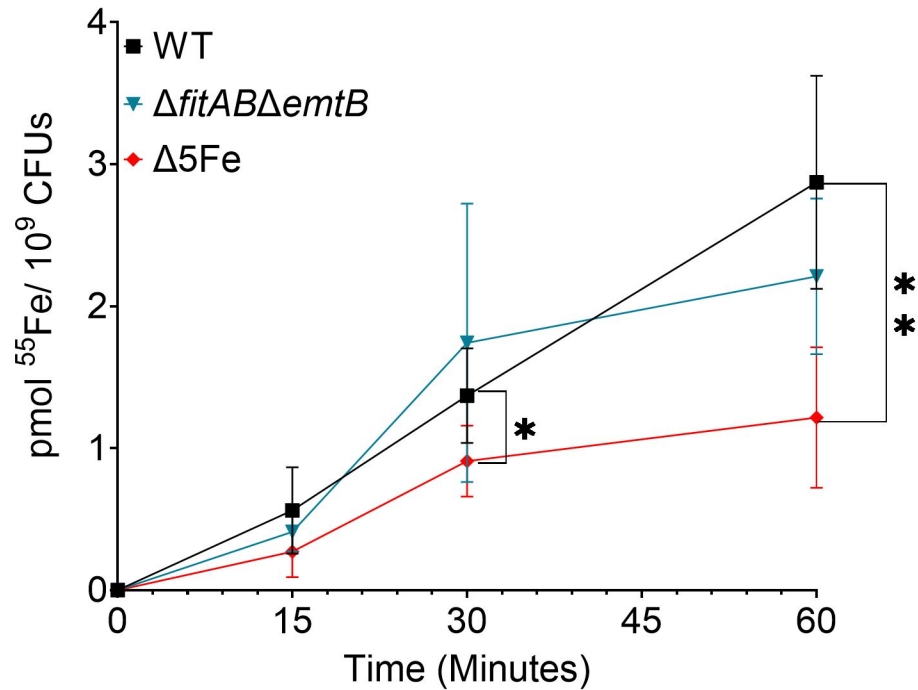

**A**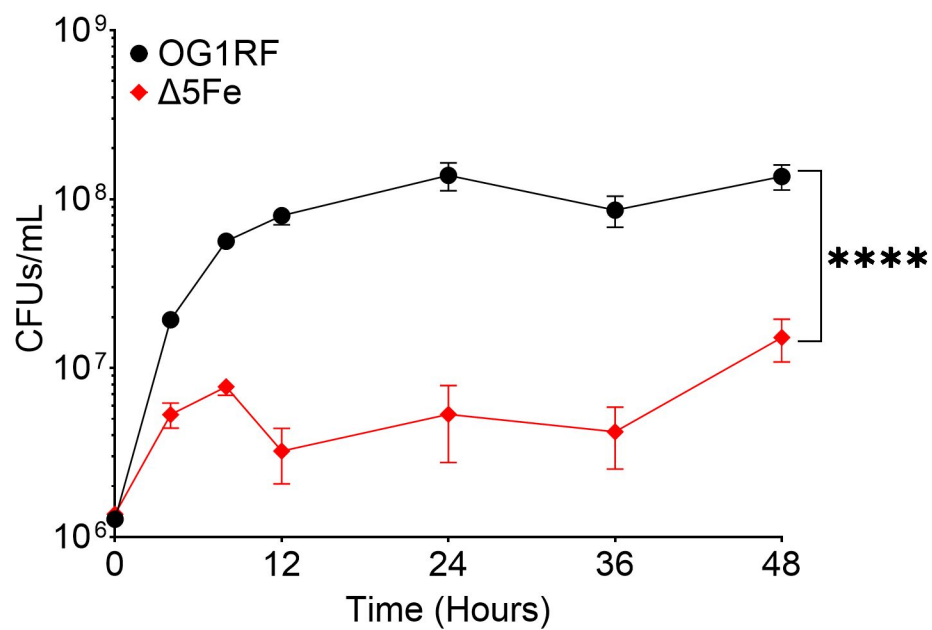**B**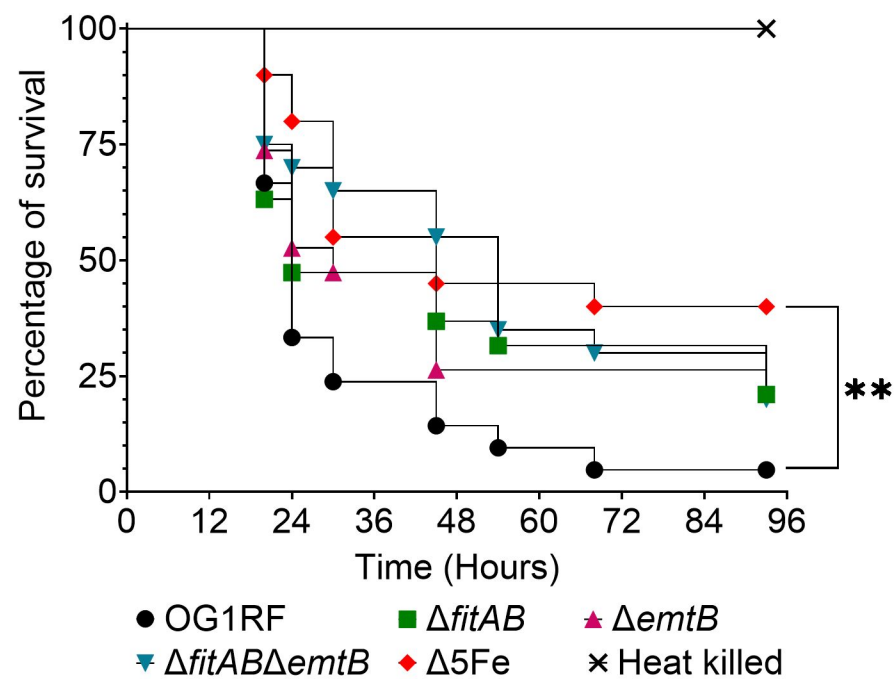**C**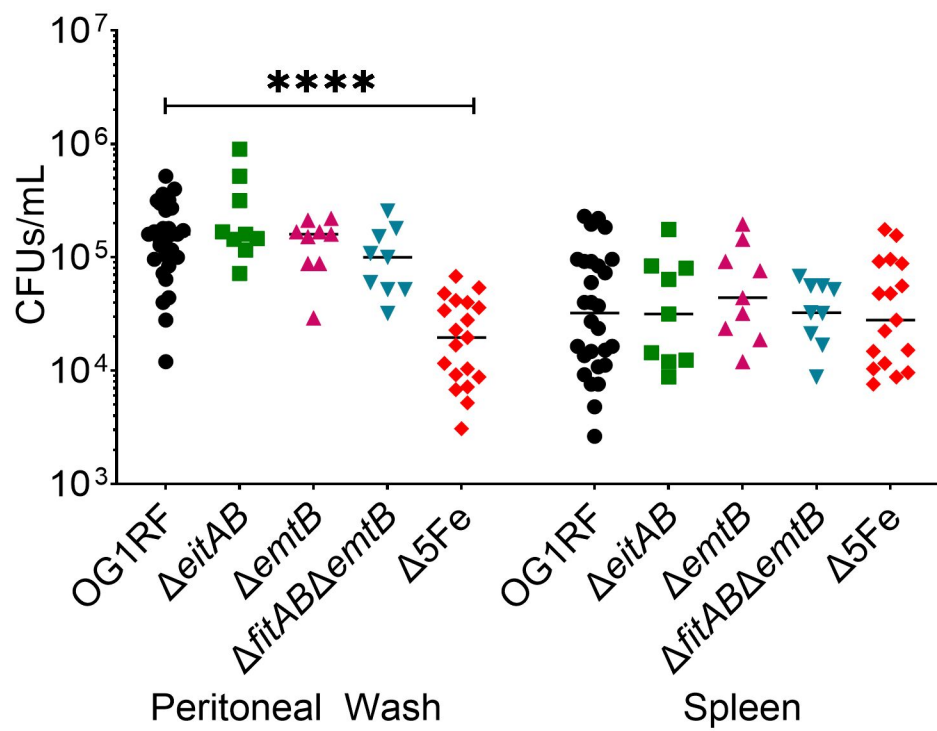**D**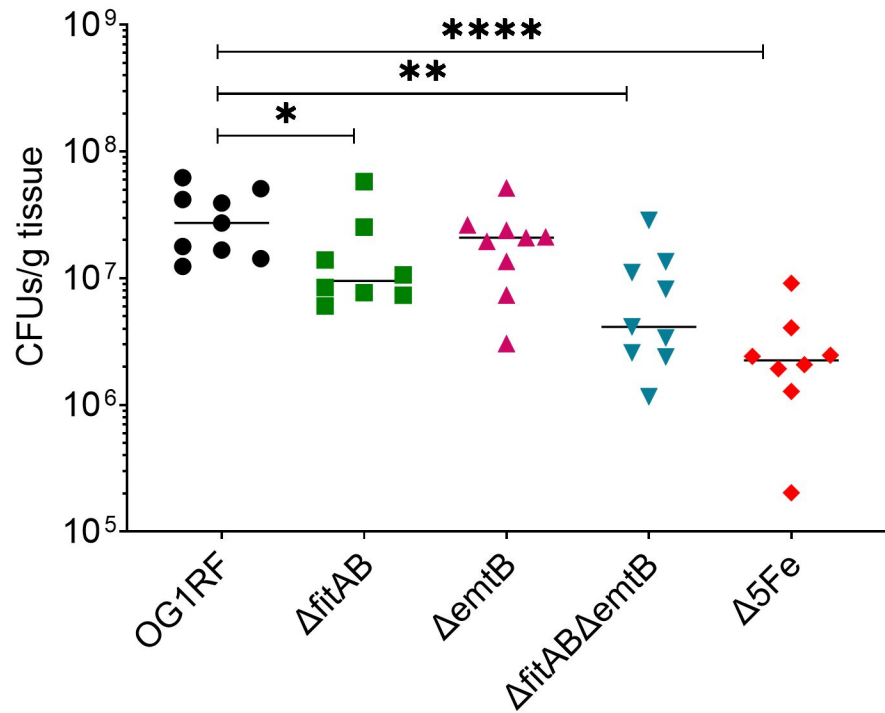

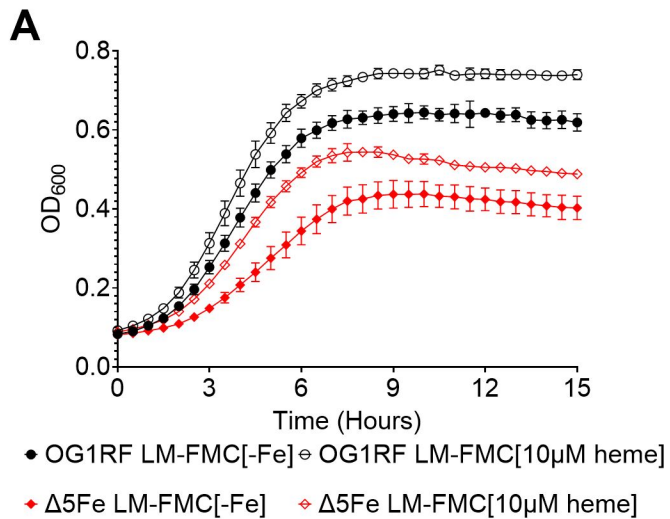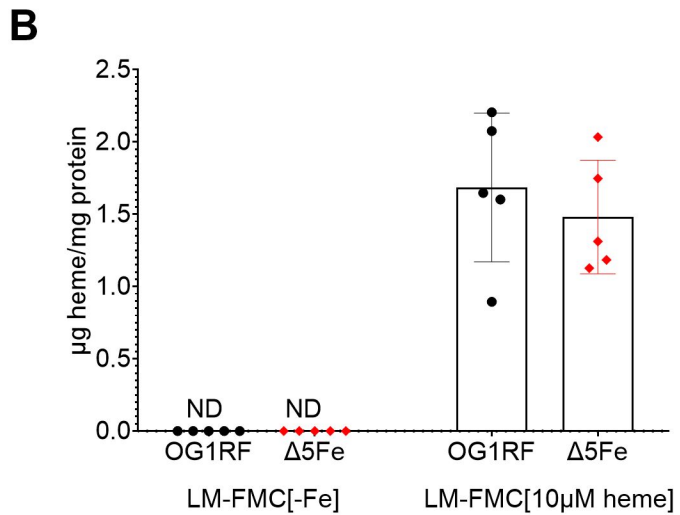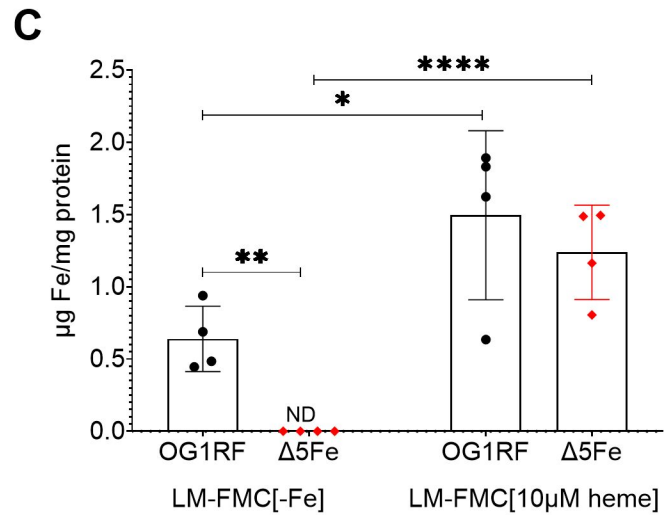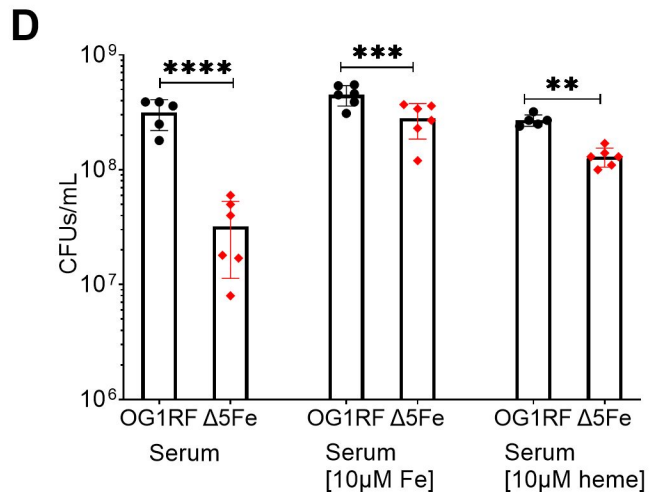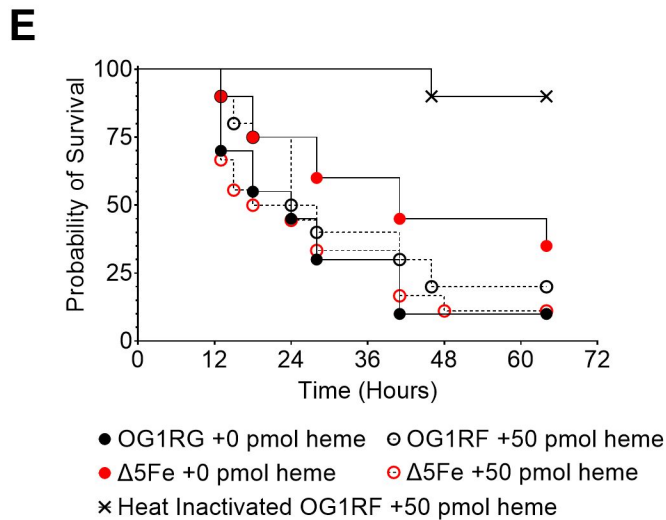

Source: https://www.biorxiv.org/content/10.1101/2022.11.04.515265v1.full.pdf
